# Wastewater-based estimation of the effective reproductive number of SARS-CoV-2

**Authors:** Jana S. Huisman (1,2,3\*), Jérémie Scire (2,3), Lea Caduff (4), Xavier Fernandez-Cassi (5), Pravin Ganesanandamoorthy (4), Anina Kull (4), Andreas Scheidegger (4), Elyse Stachler (4), Alexandria B. Boehm (6), Bridgette Hughes (7), Alisha Knudson (7), Aaron Topol (7), Krista R. Wigginton (8), Marlene K. Wolfe (6), Tamar Kohn (5,†), Christoph Ort (4,†), Tanja Stadler (2,3,†), Timothy R. Julian (4,9,10,†)

## Affiliations

1. Department of Environmental Systems Science, ETH Zurich, Swiss Federal Institute of Technology, Zurich, CH-8092, Switzerland
2. Swiss Institute of Bioinformatics, Lausanne, CH-1015, Switzerland
3. Department of Biosystems Science and Engineering, ETH Zurich, Swiss Federal Institute of Technology, Basel, CH-4058, Switzerland
4. Eawag, Swiss Federal Institute of Aquatic Science and Technology, Dübendorf, CH-8600, Switzerland
5. Laboratory of Environmental Chemistry, School of Architecture, Civil and Environmental Engineering, École Polytechnique Fédérale de Lausanne (EPFL), Lausanne, CH-1015, Switzerland
6. Department of Civil and Environmental Engineering, Stanford University, Stanford, 94305, California, United States of America
7. Verily Life Sciences, South San Francisco, 94080, California, United States of America
8. Department of Civil and Environmental Engineering, University of Michigan, Ann Arbor 48109, Michigan, United States of America
9. Swiss Tropical and Public Health Institute, Basel, CH-4051, Switzerland
10. University of Basel, Basel, CH-4055, Switzerland

†These authors contributed equally

\*Corresponding author: Jana S. Huisman; [jana.huisman@env.ethz.ch](mailto:jana.huisman@env.ethz.ch); CHN K16, Universitätsstrasse 16, 8092 Zürich, Switzerland

## Competing financial interests

*The authors declare they have no actual or potential competing financial interests.*

37 **Abstract:**

38 **Background:**

39 The effective reproductive number,  $R_e$ , is a critical indicator to monitor disease dynamics,  
40 inform regional and national policies, and estimate the effectiveness of interventions. It  
41 describes the average number of new infections caused by a single infectious person through  
42 time. To date,  $R_e$  estimates are based on clinical data such as observed cases, hospitalizations,  
43 and/or deaths. These estimates are temporarily biased when clinical testing or reporting  
44 strategies change.

45 **Objectives:**

46 We show that the dynamics of SARS-CoV-2 RNA in wastewater can be used to estimate  $R_e$  in  
47 near real-time, independent of clinical data and without the associated biases.

48 **Methods:**

49 We collected longitudinal measurements of SARS-CoV-2 RNA in wastewater in Zurich, CH, and  
50 San Jose (CA), USA. We combined this data with information on the temporal dynamics of  
51 shedding (the shedding load distribution) to estimate a time series proportional to the daily  
52 COVID-19 infection incidence. We estimated a wastewater-based  $R_e$  from this incidence.

53 **Results:**

54 The method to estimate  $R_e$  from wastewater works robustly on data from two different countries  
55 and two wastewater matrices. The resulting estimates are as similar to the  $R_e$  estimates from  
56 case report data as  $R_e$  estimates based on observed cases, hospitalizations, and deaths are  
57 among each other. We further provide details on the effect of sampling frequency and the  
58 shedding load distribution on the ability to infer  $R_e$ .

59 **Discussion:**

60 To our knowledge, this is the first time  $R_e$  has been estimated from wastewater. This method  
61 provides a low cost, rapid, and independent way to inform SARS-CoV-2 monitoring during the  
62 ongoing pandemic and is applicable to future wastewater-based epidemiology targeting other  
63 pathogens.

64

65 **Introduction:**

66 A critical quantity to monitor an ongoing epidemic is the effective reproductive number  $R_e$ <sup>1-4</sup>.  
67  $R_e$  describes the time-varying average number of new infections caused by a single infectious  
68 person throughout the course of their infection. Typically,  $R_e$  is estimated from case report data  
69 (hereafter referred to as  $R_{cc}$ ), including the numbers of new clinical cases, hospitalizations, and  
70 deaths<sup>1,3-5</sup>. Here, we show that viral RNA concentrations measured in wastewater provide an  
71 independent data set to estimate  $R_e$  (hereafter referred to as  $R_{ww}$ ). This complements existing  
72  $R_{cc}$  estimates to provide a more complete picture of transmission dynamics.

73

74  $R_e$  estimates for SARS-CoV-2 are used to inform regional and national policies<sup>6,7</sup>. The  $R_e$   
75 changes through time and reflects changes in the immune status of the population, policy,  
76 climate, and/or individual behaviors<sup>1,2</sup>. It can thus be used to estimate the effectiveness of non-  
77 pharmaceutical interventions in disease control<sup>5,8-11</sup>. However,  $R_{cc}$  estimates have some  
78 notable drawbacks. Most importantly, they depend on robust and accurate clinical case  
79 surveillance and reporting. Temporal changes in testing capacity, hospitalization criteria, or the  
80 definition of COVID-19-related deaths can bias the  $R_{cc}$  estimates<sup>1,12</sup>. These estimates are also

81 inferred with a delay:  $R_{cc}$  is estimable once the infections occurring on that day tested positive  
82 and were reported as clinical cases<sup>1,2</sup>. This delay differs through time and space, yet is  
83 necessary to accurately infer  $R_{cc}$ , thus complicating the simultaneous computation across  
84 geographic regions. Wastewater data may provide an advantage over clinical case data in all  
85 these aspects.

86  
87 SARS-CoV-2 RNA measurements in wastewater can be used to understand COVID-19  
88 epidemiology because infected individuals shed the virus into the sewer system throughout their  
89 infection. During the COVID-19 pandemic, SARS-CoV-2 RNA has been repeatedly detected in  
90 wastewater and sewage sludge globally<sup>13-19</sup>, and measured RNA concentrations or loads  
91 correlate with clinical case data<sup>13-15,17</sup>. Detection of SARS-CoV-2 RNA in the wastewater  
92 implies there is at least one actively shedding infected person in the catchment served by the  
93 sewer system. Compared to clinical testing, substantially fewer wastewater samples are  
94 required to track changes in infection incidence at the community level. Wastewater data has  
95 also been integrated into compartmental models of infectious disease transmission, allowing  
96 estimation of epidemiological parameters including incidence and the basic reproductive  
97 number  $R_0$  (which corresponds to the  $R_e$  in a fully susceptible population at the start of an  
98 outbreak)<sup>20,21</sup>. These model results are frequently validated against clinical case data, and the  
99 good correspondence between both supports the use of SARS-CoV-2 RNA measurements in  
100 wastewater to inform disease transmission dynamics. In addition, there are indications that the  
101 wastewater may track transmission dynamics more truthfully than cases, especially when test  
102 positivity is high<sup>22</sup>.

103  
104 Models relating SARS-CoV-2 RNA in wastewater to incidence or transmission rates are driven  
105 by assumptions of virus excretion rates into the sewer system. Excretion (via feces, saliva,  
106 and/or sputum) varies by individual and through time after infection. Generally, this can be  
107 described using a shedding load profile, which captures both the temporal dynamics of  
108 shedding (in the shedding load distribution; SLD), and the total amount of virus shed by an  
109 infected individual. Clinical studies in various settings have measured shedding from symptom  
110 onset onwards. Notable examples include Wölfel et al., who measured virus concentrations in  
111 the stool of hospitalized patients<sup>21,23</sup> and Han et al., who included symptomatic and  
112 asymptomatic children<sup>24</sup>. Benefield et al. combined such studies into a systematic review of  
113 SARS-CoV-2 viral loads<sup>25</sup>. However, little is known about shedding prior to symptom onset.  
114 Given uncertainty and variation in estimates of SLDs, modeling approaches to relate  
115 wastewater to transmission have varied. For example, Kaplan et al. used an infectivity profile  
116 (based on virus concentrations in the upper and lower respiratory tract from Li et al.) rather than  
117 information on gastrointestinal shedding to estimate the basic reproductive number  $R_0$  from  
118 wastewater data<sup>20,26</sup>. More work is needed to determine both the SLD and the amount of virus  
119 shed during an infection to relate SARS-CoV-2 RNA measurements in wastewater to  
120 epidemiology.

121  
122 We measure SARS-CoV-2 RNA in sewage sludge or wastewater from two distinct monitoring  
123 programs (Zurich, Switzerland and San Jose, CA, USA), use the measured RNA to estimate  
124  $R_{ww}$ , and compare the estimates to  $R_{cc}$  obtained from clinical case data. We further determine

125 the SLD that optimizes the fit between  $R_{ww}$  and  $R_{cc}$  and compare it to previously reported SLDs.  
126 We find that  $R_{ww}$  is a useful metric to monitor the transmission dynamics of SARS-CoV-2,  
127 independent from clinical case data. To our knowledge, this is the first time  $R_e$  has been  
128 estimated from pathogen concentrations in wastewater.

129

## 130 **Methods:**

### 131 **SARS-CoV-2 RNA quantification in wastewater and primary sludge**

#### 132 Overall approach.

133 Longitudinal samples of raw wastewater influent from Zurich (Switzerland) and primary sludge  
134 from San Jose (California, USA) were collected over several weeks from late 2020 through early  
135 2021. Samples were concentrated, viral RNA was extracted, and SARS-CoV-2 RNA markers as  
136 well as pepper mild mottle virus (PMMoV) RNA were quantified in each extract. PMMoV is a  
137 plant virus that is found in wastewater at high concentrations and in fairly constant loads, and  
138 serves to detect anomalies in the collected sample or problems during concentration and  
139 extraction <sup>27</sup>.

140

#### 141 Sample collection and processing

142 *Zurich approach.* From 03 September 2020 to 19 January 2021, 24-hour flow-proportional  
143 composite samples of raw influent (after fine screening) were collected from the Werdhölzli  
144 wastewater treatment plant (Zurich, Switzerland). Samples were collected twice per week  
145 (Thursdays, Sundays) until October 29; afterwards, samples were collected almost daily.  
146 Samples were collected in 500 mL polystyrene or polypropylene plastic bottles, shipped on ice,  
147 and stored at 4°C for up to 8 days before processing. Samples were processed following the  
148 protocol of Fernandez-Cassi et al. 2021 <sup>22</sup>. Briefly, aliquots (50 mL) were stirred at room  
149 temperature for 30 minutes and then clarified by sequential filtration through 2 µm glass fiber  
150 pre-filters (Merck) and 0.22 µm SteriCup filters (Merck). The filtrates were concentrated by  
151 centrifugation (3000xg for 30 minutes) using Centrifugal Filter Units (10kDa Centricon Plus-70,  
152 Millipore, USA), followed by concentrate collection from the inverted filter during 3 min at  
153 1000xg.

154

155 RNA was extracted from concentrates (140-280 µL) using the QiaAmp Viral RNA MiniKit  
156 (Qiagen, USA) according to manufacturer's instructions, using 80 µL of eluate. Until 25 October,  
157 samples were processed in duplicate (biological replicates). Samples were extracted once, and  
158 a negative extraction control using molecular grade water was run in parallel for every batch of  
159 extracted samples.

160

161 *San Jose approach.* From 15 November 2020 to 19 March 2021, 125 settled solids samples  
162 (approximately 50 mL) were collected and processed daily from the primary settling tank at the  
163 San Jose wastewater treatment plant (San Jose, CA, USA) using methods adapted from  
164 Graham et al. and described in published protocols <sup>15,28-30</sup>. Briefly, 24-hour composite samples  
165 were collected in clean plastic containers, immediately stored at 4°C, and transported to the lab  
166 for initial processing within 6 hours of collection. The solids were dewatered by centrifugation at  
167 24000xg for 30 minutes at 4°C. The supernatant was aspirated and discarded. A 0.5 - 1 g  
168 aliquot of the dewatered solids was dried at 110°C for 19-24 hours to determine its dry weight.

169 Dewatered solids were resuspended in Bovine Coronavirus (BCoV)-spiked DNA/RNA Shield  
170 (Zymo Research, Irvine, California, USA), to a concentration of 75 mg/mL. This concentration of  
171 solids represented a concentration at which the PCR inhibition of the SARS-CoV-2 assays was  
172 minimized based on experiments with solutions containing varying concentrations of solids (see  
173 Supplemental Methods)<sup>31</sup>. BCoV was spiked as an external process control. To homogenize  
174 samples, 5-10 5/32" Stainless Steel Grinding Balls (OPS Diagnostics) were added to each  
175 sample before shaking with a Geno/Grinder 2010 (Spex SamplePrep). Samples were  
176 subsequently briefly centrifuged to remove air bubbles introduced during the homogenization  
177 process, and then vortexed to re-mix the sample. Samples were either further processed  
178 immediately, or stored at 4°C for processing within 7 days.

179  
180 RNA was extracted from 300 µL of homogenized sample using the Chemagic™ Viral DNA/RNA  
181 300 Kit H96 for the Perkin Elmer Chemagic 360 into 60 µL of eluent followed by PCR Inhibitor  
182 Removal with the Zymo OneStep-96 PCR Inhibitor Removal Kit<sup>29</sup>. Each sample was extracted  
183 ten times. In addition, extraction negative and extraction positive controls, consisting of  
184 approximately 500 copies of SARS-CoV-2 genomic RNA (ATCC), were extracted using the  
185 same protocol as the homogenized samples in each batch of sample extraction.

#### 186 187 Quantification of viral targets

188 *Zurich approach.* SARS-CoV-2 N gene markers N1 and N2 were quantified immediately or  
189 within one week after RNA extraction (storage at -80°C) using digital RT-PCR (RT-dPCR). RT-  
190 dPCR was performed on 5 µL RNA extract as template on either the Bio-Rad QX200 Droplet  
191 Digital (01 September 2020 - 7 October 2020) with the One-Step RT-ddPCR Advanced Kit for  
192 Probes (Bio-Rad CN 1864021) or Crystal Digital PCR using the Naica System (Stilla  
193 Technologies, 8 October - 20 January 2021) with the qScript XLT 1-Step RT-PCR Kit  
194 (QuantaBio CN 95132-500). SARS-CoV-2 N1 and N2 markers for the N gene were detected  
195 using the 2019-nCoV CDC ddPCR Triplex Probe Assay (Assay ID dEXD28563542, Bio-Rad)  
196 according to manufacturer's instructions, with proprietary primer and probe concentrations.  
197 Primer and probe sequences are specified in Table S4, and further dPCR details in Table S5.

198  
199 For samples processed on the Bio-Rad QX200, 20 µL reaction volumes were prepared in a pre-  
200 reaction volume of 22 µL consisting of 5.5 µL of template, 5.5 µL of Supermix, 2.2 µL of  
201 Reverse Transcriptase, 1.1 µL of DTT and 1.1 µL of 20x 2019-nCoV CDC ddPCR Triplex Probe  
202 Assay. Droplets were generated using the QX100 Droplet Generator (Bio-Rad). PCR was  
203 performed on the T100 Thermal Cycler (Bio-Rad) with the following protocol: hold at 25°C for 3  
204 minutes, reverse transcription at 50°C for 60 minutes, enzyme activation at 95°C for 10 minutes,  
205 40 cycles of denaturation at 95°C for 30 seconds and annealing and extension at 55°C for 1  
206 minute, enzyme deactivation at 98°C for 10 minutes, and an indefinite hold at 4°C. Ramp rate  
207 was 2°C/second, and the final hold at 4°C was at least 30 minutes to stabilize droplets. Droplets  
208 were analyzed using the QX200 Droplet Reader (Bio-Rad) and thresholding done on the  
209 QuantaSoft Analysis Pro Software (Bio-Rad, Version 1.0).

210 For samples processed on the Crystal Digital PCR, 25 µL reactions were prepared in 27 µL pre-  
211 reaction volumes for Sapphire Chips (Stilla Technologies CN C14012) consisting of 5.4 µL of

212 template, 13.5  $\mu$ L of 2x qScript XLT One-Step RT-PCR, and 1.35  $\mu$ L of 20x 2019-nCov CDC  
213 ddPCR Triplex Probe Assay. Droplet production and PCR were performed on the Naica Geode  
214 with the following protocol: reverse transcription at 48°C for 50 minutes, denaturation at 94°C for  
215 3 minutes, followed by 40 cycles of denaturation at 94°C for 30 seconds, annealing and  
216 extension at 57°C for 1 minute. Chips were read and analyzed on the Naica Prism3 using the  
217 Crystal Reader and Crystal Miner software (Stilla Technologies).

218 For the Bio-Rad QX200 samples with more than 12000 droplets with average partitioning  
219 volume of 1 nL were deemed acceptable. For the Stilla Crystal Digital PCR 15000 droplets with  
220 average 0.8 nL were deemed acceptable. The average (standard deviation) number of droplets  
221 observed in samples from QX200 was 15000 (2100) and for the Crystal Digital PCR excluding  
222 controls was 24000 (2000). Average copies per partition (relative uncertainty) was  $8.7 \times 10^{-3}$   
223 (54%). Technical replicate variability was, on average, less than 20%. The variation amongst  
224 distinct RT-dPCR runs (inter-experimental variation) was quantified as the coefficient of  
225 variation in the performance of a positive control (100 gene copies (gc)/reaction of synthetic  
226 SARS-CoV-2 RNA reference material; EURM-019, Joint Research Center) across 87 runs, and  
227 was less than 25%. Assays were only conducted in one laboratory, so reproducibility was not  
228 assessed. Example fluorescence plots are provided in the Supporting Information (Figures S11,  
229 S12).

230  
231 Samples were diluted 10-fold in a single step using molecular grade water before quantification  
232 in replicate wells. In addition, every thermal cycler run included one positive control and one no  
233 template control (NTC) consisting of RNase/DNase-free water. Thermal cycle runs and  
234 associated samples were deemed acceptable if the NTCs in the run contained 2 or fewer  
235 positive droplets, and there was detectable SARS-CoV-2 RNA in the positive controls. All RT-  
236 dPCR runs fulfilled these criteria, with an average (standard deviation) concentration of the  
237 positive controls of 101 (25) gc/reaction, in line with the target concentration. If the sample  
238 concentration was below the limit of quantification (LOQ), an undiluted sample was quantified.  
239 The limit of detection (LOD) and limit of quantification (LOQ) of the N1 and N2 markers were  
240 determined by processing 10 replicates of synthetic SARS-CoV-2 RNA reference material at  
241 target concentrations of 5, 8, 10, 25, 30, and 50 gc/reaction. The LOD was defined as the lowest  
242 sample concentration distinguishable from the no template control in at least 8 out of 10  
243 replicates (3 or more positive droplets). At this concentration, there would be a >95% likelihood  
244 of detecting the target in at least one of the two technical replicates<sup>32</sup>. Using this criterion, LOD  
245 was determined to be 8 gc/reaction (equivalent to 2560 gc/L wastewater)<sup>32</sup>. LOQ was  
246 determined to be 25 gc/reaction (equivalent to 8000 gc/L wastewater), which was the lowest  
247 concentration with coefficient of variation less than 25%<sup>32</sup>. When sample concentrations were  
248 below the LOQ, samples were processed without dilution. Only one sample (September 20,  
249 replicate B) remained below LOQ in both dilute and undilute samples (22.5 gc/reaction). This  
250 sample was included in the analysis anyway.

251  
252 To test PCR inhibition, the RT-dPCR was repeated using mastermix with a spiked internal  
253 positive control consisting of 800 gc/reaction of synthetic SARS-CoV-2 RNA reference material  
254 (EURM-019, Joint Research Center) so inhibition testing could be performed on the same assay

255 used for quantification.<sup>33</sup> Samples were added to the mastermix with a spiked internal control at  
256 the same dilution used for quantification of the N1 and N2 markers. If either the observed N1 or  
257 N2 concentration in the samples analyzed in mastermix with synthetic SARS-CoV-2 RNA was  
258 80% or less than the sum of the concentration of SARS-CoV-2 RNA in the samples (unspiked)  
259 plus the concentration in the sample-free, spiked internal positive control, then the samples  
260 were considered inhibited. Inhibited samples were diluted 1:10, retested for SARS-CoV-2 as  
261 well as inhibition using the same spiked internal positive control. Dilution sufficiently reduced  
262 inhibition for all affected samples.

263 PMMoV was quantified by RT-qPCR using RNA UltraSense™ One-Step Quantitative RT-PCR  
264 System (Applied Biosystems CN 11732927) on a LightCycler® 480 instrument (Roche Life  
265 Science, Switzerland) using previously reported primers and probes (Microsynth AG,  
266 Switzerland, Table S4)<sup>34,35</sup>. RNA extract aliquots that were separately stored at -80°C for less  
267 than three months were used as template. Samples were prepared in 25 µL reaction volumes  
268 consisting of 5 µL of template, 5 µL of 5x Ultrasense Mix, 4 µL of Bovine Serum Albumin  
269 (Sigma-Aldrich CN 05470-1G) at 2 mg/mL concentration, 1.25 µL of Reverse Transcriptase, and  
270 1 µL of each primer at final concentrations of 400 nM and 0.25 µL of probe at a final  
271 concentration of 250 nM. The RT-qPCR was run with the following program: reverse  
272 transcription at 55°C for 60 minutes, denaturation at 95°C for 10 minutes, followed by 45 cycles  
273 of denaturation at 95°C for 15 seconds, annealing and extension at 60°C for 1 minute. PMMoV  
274 quantification was performed in six separate RT-qPCR runs by comparison to synthetic DNA  
275 standards (gBlock, IDT Technologies) run in duplicate at tenfold dilutions between  $5 \times 10^2$  (the  
276 lowest concentration measured) and  $5 \times 10^7$  per 5 µL reaction. All thermal cycler runs were  
277 pooled for analysis. The pooled standard curve had an amplification efficiency of 97.4% and a  
278 goodness-of-fit ( $R^2$ ) of 0.997.

279  
280 *San Jose approach.* RNA extracts were used as template in RT-dPCR assays for SARS-CoV-2  
281 N, S, and ORF1a RNA gene targets in a triplex assay, and PMMoV and BCoV in a duplex  
282 assay. All primers and probes are listed in Table S4. The SARS-CoV-2 assays were designed  
283 using Primer3Plus (<https://primer3plus.com/>) based on the genome of the severe acute  
284 respiratory syndrome coronavirus 2 isolate Wuhan-Hu-1 (Accession Number MN908947.3).  
285 The assay was designed to target product size range of 60-200 bp at concentration of dNTPs of  
286 0.8 mM and concentration of divalent cations of 3.8 mM, based on the following optimum  
287 (range) conditions: primer size: 20bp (15bp, 36bp); primer melting temperature 60°C (50°C,  
288 65°C); primer GC content: 50% (40%, 60%); hydrolysis probe size 20bp (15bp, 27bp); hydrolysis  
289 probe melting temperature 63°C (62°C, 70°C); hydrolysis probe GC content: 50% (30%, 80%).  
290 The location (length) of the amplicons for N is 28287-28457 (171 bp), S is 23591-23665 (75 bp),  
291 and ORF1a is 12885-13063 (179 bp). Cross-reactivity was determined in silico using NCBI  
292 Blast. The assays were optimized by varying annealing temperature, and benchmarked against  
293 a respiratory virus verification panel using extracted RNA. Limit of the Blank was determined  
294 using negative nasal swab samples.

295  
296 RT-dPCR was performed as previously described for the Bio-Rad QX200 analysis conducted in  
297 Zurich using the One-Step RT-ddPCR Advanced Kit for Probes (Bio-Rad 1863021) with primers

298 (900 nM) and probes (250 nM) targeting N, S, and ORF1a RNA. Droplets were generated using  
299 the AutoDG Automated Droplet Generator (Bio-Rad). PCR was performed using Mastercycler  
300 Pro with the following protocol: reverse transcription at 50°C for 60 minutes, enzyme activation  
301 at 95°C for 5 minutes, 40 cycles of denaturation at 95°C for 30 seconds and annealing and  
302 extension at either 59°C (for SARS-CoV-2 assay) or 56°C (for PMMoV/BCoV duplex assay) for  
303 30 seconds, enzyme deactivation at 98°C for 10 minutes then an indefinite hold at 4°C. The  
304 ramp rate for temperature changes were set to 2°C/second and the final hold at 4°C was  
305 performed for a minimum of 30 minutes to allow the droplets to stabilize.

306  
307 Droplets were analyzed using the QX200 Droplet Reader (Bio-Rad), with thresholding done  
308 using QuantaSoft™ Analysis Pro Software (Bio-Rad, Version 1.0.596). The average (standard  
309 deviation) number of droplets in ten merged wells determined from a random subset of ten  
310 samples was 176000 (14500). Average (relative uncertainty) of the number of copies per  
311 partition in the same subset was  $3.2 \times 10^{-3}$  (52%). As the samples were extracted ten times and  
312 each extract analyzed in one well, technical replicate variability incorporates variation from both  
313 RNA extraction and RT-dPCR. Sample errors estimated from the merged wells were <10%, in  
314 line with coefficient of variation estimates of <8% for all three targets (S, N, ORF1a) in an  
315 experiment of replicate (n = 97) positive controls at target concentrations of 400 gc/reaction.  
316 Assays were conducted in only one lab, so reproducibility was not assessed. Example  
317 fluorescence plots are provided in the associated reference by Topol et al.<sup>30</sup>. All liquid transfers  
318 were performed using the Agilent Bravo (Agilent Technologies).

319  
320 Undiluted extract was used for the SARS-CoV-2 assay template and a 1:100 dilution of the  
321 extract (2 µL into 198 µL molecular grade water) was used for the PMMoV and BCoV assay  
322 template. The 1:100 dilution is required since PMMoV is in high concentrations, and it is  
323 important to be able to quantify the target and not saturate the number of positive partitions.

324  
325 Each sample was run in 10 replicate wells, extraction negative controls were run in 7 wells, and  
326 extraction positive controls in 1 well. In addition, PCR positive controls for SARS-CoV-2 RNA  
327 were run in 1 well, and NTC were run in 7 wells. Results from replicate wells were merged for  
328 analysis. Negative controls were required to have less than 2 droplets across all wells, PCR  
329 positive controls were required to have ~200 positive droplets, and PCR positive extraction  
330 controls were required to have ~ 50 positive droplets. If controls did not meet these acceptability  
331 criteria, then the samples included on that plate were re-processed. Therefore, none of the  
332 samples included in this study had controls that failed these acceptability criteria.

333  
334 Data analysis and exclusion criteria  
335 *Zurich approach.* Concentrations of RNA targets were multiplied by the daily flow rate to  
336 estimate the total number of genome copies (gc) shed by people within the catchment per day  
337 (referred to as loads and reported as gc/day). Samples with PMMoV loads outside the mean  
338 plus or minus three times the standard deviation were considered as inconsistent with respect to  
339 virus recovery and were excluded from further analysis. Inhibited samples were also removed  
340 from further analysis.

341



342 *San Jose approach.* Concentrations of RNA targets were converted to concentrations per dry  
343 weight of solids in units of gc/g dry weight. PMMoV was also used to monitor virus recovery in  
344 the San Jose samples, using the same criteria as for the Zurich samples. BCoV was used to  
345 assess virus recovery, and samples were removed from further analysis if the amount  
346 recovered was less than 10% of the amount added.

347

### 348 **Deconvolution by the Shedding Load Distribution**

349 To relate the viral RNA loads or concentrations measured in wastewater to the number of new  
350 infections per day, we used information on the profile of SARS-CoV-2 RNA shedding into the  
351 wastewater by an infected individual in days after infection or symptom onset. In general, this  
352 profile contains information about both the magnitude and timing of viral RNA shedding: (i) the  
353 SLD  $\sum_j w_j$  (a unitless distribution which sums to 1) describes the temporal dynamics of  
354 shedding, and (ii) a normalization factor  $N$  describes the total amount of virus shed by an  
355 infected individual during the course of infection (in units of gc/infection). After shedding,  
356 downstream processes further affect the total amount of viral RNA sampled per infected  
357 individual. We assume this does not affect the temporal dynamics, and can be summarised into  
358 a second normalization factor  $M$ . In general,  $M$  will depend on the sewer system, the sampling  
359 point within the wastewater treatment plant, choice of sample matrix and processing pipeline.  
360 The units of  $M$  differ depending on the way viral concentrations were measured: in this study  $M$   
361 is unitless for Zurich, and day/g-dry weight for San Jose.

362 With these definitions, the measurement  $C_i$  of viral RNA in the wastewater on day  $i$  is related to  
363 the past incidence of infections  $I_j$  on day  $j$ :

$$364 \quad C_i = N \cdot M \sum_j w_{i-j} I_j,$$

365 i.e. the observed wastewater measurements are a convolution of the daily infection incidence  
366 with the SLD.

367

368 To obtain the infection incidence, we first filled gaps in the wastewater data through linear  
369 interpolation, and smoothed it using local polynomial regression (LOESS) with 1st order  
370 polynomials and tricubic weights that take into account 21 days of data around each point. To  
371 deconvolve the resulting time series we used an Expectation-Maximisation algorithm<sup>2</sup>, which  
372 iteratively determines the time series  $I(t)$  that maximizes the likelihood of the smoothed  
373 wastewater measurements  $\bar{C}(t)$  (either in units of gc/day or gc/g-dry weight), given assumptions  
374 on  $N$ ,  $M$ , and  $\sum_j w_j$ .

375

376 For the main analysis, we deconvolved by a SLD which was a combination of the incubation  
377 period (the time from infection to symptom onset) and the gastrointestinal SLD from Benefield et  
378 al. for the time from symptom onset to shedding<sup>25</sup>. Figure 3 from Benefield et al.<sup>25</sup> was digitized  
379 manually, and yielded a gamma distribution with mean 6.7 days and standard deviation 7.0  
380 days<sup>22</sup>. For the incubation period, we used the distribution of Linton et al.: a gamma distribution  
381 with mean 5.3 days and standard deviation 3.2 days<sup>36</sup>. For additional comparisons (Fig. S5,  
382 S6), we exchanged the Benefield distribution for the SLD upon symptom onset reported by Han  
383 et al., gamma distributed with mean 4.7 days, standard deviation 1.7 days<sup>24</sup>, or the symptom

384 onset to death delay distribution from Linton et al., gamma distributed with mean 15 days,  
385 standard deviation 6.9 days<sup>36</sup>.

386  
387 Since the normalization factors N and M are difficult to measure, and only influence  $R_{\text{ww}}$  point  
388 estimates when off by several orders of magnitude (Fig. S6), we made a simplifying assumption.  
389 We assumed the lowest measured RNA load (Zurich) or concentration (San Jose) represents  
390 the viral load or concentration from a single infection ( $N \cdot M$ ). For the Zurich wastewater data, this  
391 was  $1 \cdot 10^{12}$  gc per infection, and for the San Jose sewage sludge measurements this was  
392 2663.7 gc/g-dry weight per infection/day.

393

### 394 **Effective Reproductive Number Estimates**

395 The effective reproductive number was estimated from SARS-CoV-2 RNA loads in wastewater  
396 or concentrations in sewage sludge using the pipeline developed in Huisman *et al.*<sup>2</sup>. In brief, we  
397 first transformed SARS-CoV-2 RNA measurements into a time series of infection incidence as  
398 described in the Deconvolution section above. Second, we used the R package EpiEstim to  
399 estimate the effective reproductive number  $R_e$  from this infection incidence<sup>4,37</sup>. The pipeline  
400 further accounts for noise in the observation process, by bootstrapping the observations prior to  
401 smoothing and deconvolution. Specifically, we block-bootstrap the log-transformed residuals  
402 between the linear interpolated original observations and the smoothed value<sup>2</sup>.

403

404 To estimate  $R_{\text{cc}}$  for Zurich, we obtained the cases reported for the catchment from the Health  
405 Department of Canton Zurich. We then used the pipeline from Huisman *et al.*<sup>2</sup>, where we  
406 deconvolved by a distribution specifying the delay from infection to case confirmation. This was  
407 parameterized as the sum of a gamma distributed incubation period with mean 5.3 days,  
408 standard deviation 3.2 days<sup>36</sup>; and a gamma distributed delay from symptom onset to case  
409 confirmation with mean 2.8 days, standard deviation 3.0 days (estimated from line list data for  
410 canton Zurich, Sep. 2020-Jan. 2021). The reported  $R_{\text{cc}}$  values for confirmed cases,  
411 hospitalizations, and deaths at the cantonal level were taken from [https://github.com/covid-19-](https://github.com/covid-19-Re/dailyRe-Data)  
412 [Re/dailyRe-Data](https://github.com/covid-19-Re/dailyRe-Data) (based on Huisman *et al.*<sup>2</sup>). For the Swiss data, “case confirmation” refers to  
413 the earliest recorded date of either a positive test or case reporting.

414

415 To estimate  $R_{\text{cc}}$  in San Jose, we downloaded daily COVID-19 case incidence data for Santa  
416 Clara County from the California Health and Human Services Open Data portal  
417 (<https://data.chhs.ca.gov/dataset/covid-19-time-series-metrics-by-county-and-state>). The  
418 wastewater from Santa Clara County (population of 1.7 million) is nearly all treated at the San  
419 Jose wastewater treatment plant (catchment population of 1.5 million). We estimated  $R_{\text{cc}}$  using  
420 the pipeline from Huisman *et al.*<sup>2</sup>, with the incubation period as before<sup>36</sup>; and a gamma  
421 distributed symptom onset to case reporting delay distribution with a mean of 4.51 days and  
422 standard deviation of 3.16 days (estimated from line list data for Santa Clara County in  
423 December; based on personal correspondence with the California Department of Public Health  
424 COVID-19 modelling team). During the study period, the mean of this distribution changed from  
425 5.24 to 3.31 days, and the standard deviation from 3.55 to 2.32 days. Negative numbers of  
426 cases reported (Dec. 30) were set to 0 for the main analysis (Fig. 2), and to 1000 to test the  
427 impact of misreporting (Fig. S2).

428  
429 To estimate  $R_e$  for the testing-adjusted cases, we extracted the daily number of positive tests /  
430 total number of tests, multiplied by the mean number of tests during the time period (14960.3).  
431 This time series was then used to estimate  $R_e$ , similar to the confirmed cases (with the same  
432 delay distribution)<sup>2</sup>. Technically, the tests are reported by testing date, which typically precedes  
433 the reporting date, so this constitutes a misspecification of the delay distribution. However, an  
434 analysis where the delay between symptom onset and testing was assumed 0 did not yield  
435 qualitatively different results (Fig. S1). We additionally compared our estimates to the  $R_{cc}$   
436 estimates for Santa Clara County from the California COVID assessment tool  
437 (<https://calcat.covid19.ca.gov/cacovidmodels/>).

438  
439 **Comparing  $R_e$  traces**  
440 We assessed how well the  $R_e$  estimates from SARS-CoV-2 concentrations in wastewater ( $R_{ww}$ )  
441 match those estimated from case report data ( $R_{cc}$ ) using several measures. First, the average  
442 root mean squared error between both point estimates across the time series (“RMSE”):

443 
$$\sqrt{\frac{1}{K} \sum_{j=1}^K (R_{ww,j} - R_{cc,j})^2},$$

444 where  $j$  describes the date, and  $K$  the length of the time series. Second, the fraction of dates  
445 where the  $R_{ww}$  point estimate was within the confidence interval of the  $R_{cc}$  estimate (“coverage”).  
446 Third, the mean average percentage error between the time series (“MAPE”):

447 
$$\frac{1}{K} \sum_{j=1}^K \left| \frac{R_{cc,j} - R_{ww,j}}{R_{cc,j}} \right|.$$

448 **Scanning across shedding load distributions**  
449 To investigate optimal parameters for the SLD, we conducted two separate scans. In the first  
450 scan, we varied the parameters of the SLD from infection. In the second scan, we estimated the  
451 parameters of the SLD from symptom onset onwards. In the latter case, the delay sampled from  
452 the SLD was added to a second sampled delay corresponding to the incubation period (gamma  
453 distributed with mean 5.3 days and standard deviation of 3.2 days)<sup>36</sup>. In both cases, we  
454 assumed the SLD was described by a gamma distribution, and varied the mean  $\mu$  and standard  
455 deviation  $\sigma$  on a grid ( $\mu \in \{0.5, 1.0, \dots, 15\}$  and  $\sigma \in \{0.5, 1.0, \dots, 10\}$ ). The normalization factor  
456 ( $N \cdot M$ ) was kept fixed to the location-specific value throughout. The  $R_{ww}$  for the wastewater data  
457 was estimated across 50 bootstrap samples and compared to the  $R_{cc}$  for the catchment.

458  
459 **Availability Statement**  
460 All code and case data for Zurich are publicly available through the Github repository  
461 <https://github.com/JSHuisman/wastewaterRe>. Wastewater measurements and daily flow rates  
462 for Zurich are available at DOI: 10.25678/0003VC. Measurements from San Jose are available  
463 from the Stanford Data Repository <https://purl.stanford.edu/bx987vn9177><sup>31</sup>, and case data for  
464 Santa Clara County is available from the California Health and Human Services Open Data  
465 portal (<https://data.chhs.ca.gov/dataset/covid-19-time-series-metrics-by-county-and-state>).  
466

467 **Approval**

468 No ethics approval was required for this study as no humans or animals were involved.

469

470 **Results:**

471 **SARS-CoV-2 RNA in Wastewater.** We tracked SARS-CoV-2 RNA concentrations in Zurich,  
472 Switzerland and San Jose, California, USA during a rise and fall in clinical COVID-19 cases  
473 (Fig. 1A,B; Fig. 2A,B). Data from Zurich were used to develop and assess  $R_{ww}$  estimates, and  
474 data from San Jose were used to assess the generalizability of the approach.

475

476 In Zurich, SARS-CoV-2 N1 and N2 markers of the N gene were detectable in the raw influent  
477 samples from the Zurich wastewater treatment plant between 1 September 2020 and 19  
478 January 2021 in all 99 samples collected (Fig. 1A). Of these, the average of the technical  
479 replicates was above the limit of quantification in 97, yielding median [range] loads of 13.4 [ $<12$   
480 (limit of detection), 13.7]  $\log_{10}$  gc/day (Fig. 1A). Two samples (11 and 29 October 2020) were  
481 excluded based on quality control, which included monitoring sample inhibition and consistency  
482 of effluent pepper mild mottle virus (PMMoV) loads.

483

484 In San Jose, SARS-CoV-2 N, S, and ORF1a genes were quantifiable in the settled solids of the  
485 primary settling tank in all 125 samples collected between 15 November 2020 and 19 March  
486 2021 (Fig. 2A). The median [range] concentrations were 4.9 [3.4, 6.0], 5.0 [3.9, 6.0], and 5.0  
487 [3.8, 6.0]  $\log_{10}$  gene copies per gram dry weight (gc/g-dry weight) for N, S, and ORF1a genes,  
488 respectively (Fig. 2A). Three samples (03 January, 18 February, 19 March 2021) were excluded  
489 based on quality control using consistency of PMMoV concentrations.

490

491 Details pertaining to PMMoV measurements in all samples and resulting sample exclusion are  
492 given in the Supplemental Results.

493

494 **Inferring the infection incidence dynamics.** Next, we related the RNA measurements in  
495 wastewater to the original infection incidence by applying a deconvolution with the shedding  
496 load distribution. SARS-CoV-2 wastewater measurements reflect the cumulative contributions of  
497 all infected individuals actively shedding virus into the wastewater. The amount of virus shed by  
498 each individual varies through time after infection, and is captured in the shedding load profile.  
499 In general, this profile contains information about the timing of viral shedding - the shedding load  
500 distribution (SLD; which sums to 1) - and the total amount of virus shed - captured by a  
501 normalization factor  $N$ . To estimate the true number of infections in the sewer shed it is  
502 important to estimate the exact value of the normalization factor  $N$ , as well as a factor  $M$   
503 describing losses along the way from shedding to sample processing. However, to estimate  $R_e$   
504 it suffices to know the temporal dynamics of shedding and infection (described in more detail in  
505 the Methods). As a first approximation, we assumed individuals do not shed prior to symptom  
506 onset, and thereafter shed according to the gastrointestinal SLD reported by Benefield et al.<sup>25</sup>.  
507 With this assumption, we found that the dynamics of infection incidence inferred from  
508 wastewater measurements in Zurich are similar to the dynamics inferred from clinical case data  
509 (Fig. 1C). In particular, both data sources show a steep increase starting from mid-September,  
510 and capture two peaks (indicative of  $R_e=1$ ) around late October and early December, each of

511 which is followed by relatively rapid decline in daily case incidence. We later test the sensitivity  
512 of our results to the assumed SLD and normalization.

513  
514 **Estimating the effective reproductive number  $R_{ww}$  from wastewater measurements.** We  
515 used the inferred time series of infection incidence from SARS-CoV-2 RNA measured in  
516 wastewater to estimate  $R_{ww}$  in Zurich (Fig. 1D). The N1 and N2 markers result in nearly identical  
517  $R_{ww}$  estimates, and there is a good correspondence between  $R_{ww}$  and  $R_{cc}$ . Both estimates show  
518 a rapid increase up to  $Re = 1.5$  in mid-September, a decline to below 1 in late October, followed  
519 by a period where  $Re$  was slightly above 1 until dropping more clearly below 1 from early  
520 December onwards.  $R_{ww}$  and  $R_{cc}$  are changing in similar ways, with  $R_{cc}$  lagging the  $R_{ww}$   
521 trajectory. Since both estimates describe the same underlying epidemic, this suggests that the  
522 wastewater measurements may be deconvolved too far back in time (the mean of the SLD is  
523 too high), or that the confirmed cases are not deconvolved back far enough (the mean of the  
524 delay distribution is too low).

525  
526 Over the entire time period, the average root mean squared error (RMSE) between  $R_{ww}$  and  $R_{cc}$   
527 is 0.11 and 0.12 for N1 and N2 respectively. This is smaller than the RMSE between the  $Re$   
528 estimates based on different sources of case report data: 0.13 between confirmed cases and  
529 hospitalizations; and 0.26 between confirmed cases and deaths (estimated on case report data  
530 from canton Zurich, which has a population 3.4x the size of the catchment, for the same time  
531 period as  $R_{ww}$ ).

532

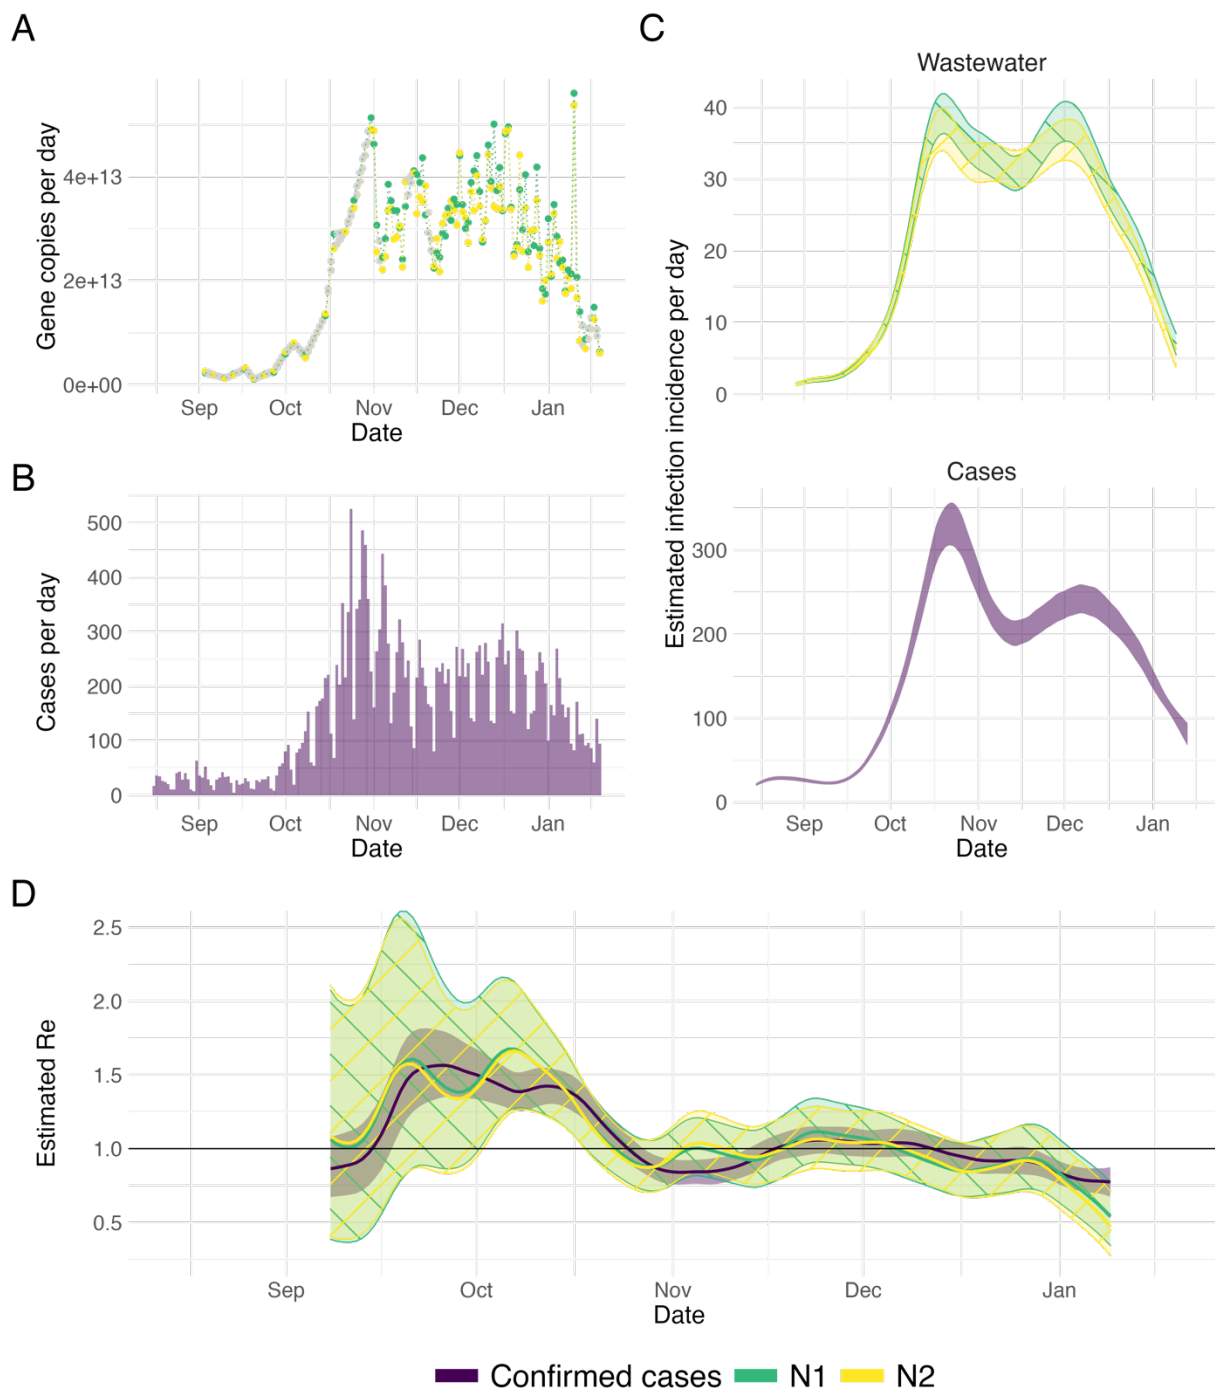

533  
 534 **Fig. 1:  $R_{ww}$  estimation from Zurich (CHE) wastewater measurements.** (A) Measured RNA  
 535 loads of the N1 and N2 markers (green and yellow respectively) between 1 September 2020  
 536 and 19 January 2021. Imputed values are indicated in grey. (B) Confirmed cases (purple) in the  
 537 catchment during the same time period. (C) The estimated infection incidence in the catchment  
 538 per day from normalized RNA loads of the N1 and N2 markers (top; green and yellow  
 539 respectively), and case reports (bottom; purple). The measured loads were normalized by the  
 540 lowest measured value ( $N \cdot M = 1 \cdot 10^{12}$  gc per infection). The ribbons indicate the mean  $\pm$

541 standard deviation across 1000 bootstrap replicates. (D) The estimated  $R_{ww}$  compared to the  $R_{cc}$   
 542 from confirmed cases. The colored line indicates the point estimate on the original data, and the  
 543 ribbons the 95% confidence interval across 1000 bootstrap replicates. The N1 and N2-based  
 544 confidence intervals nearly completely overlap.

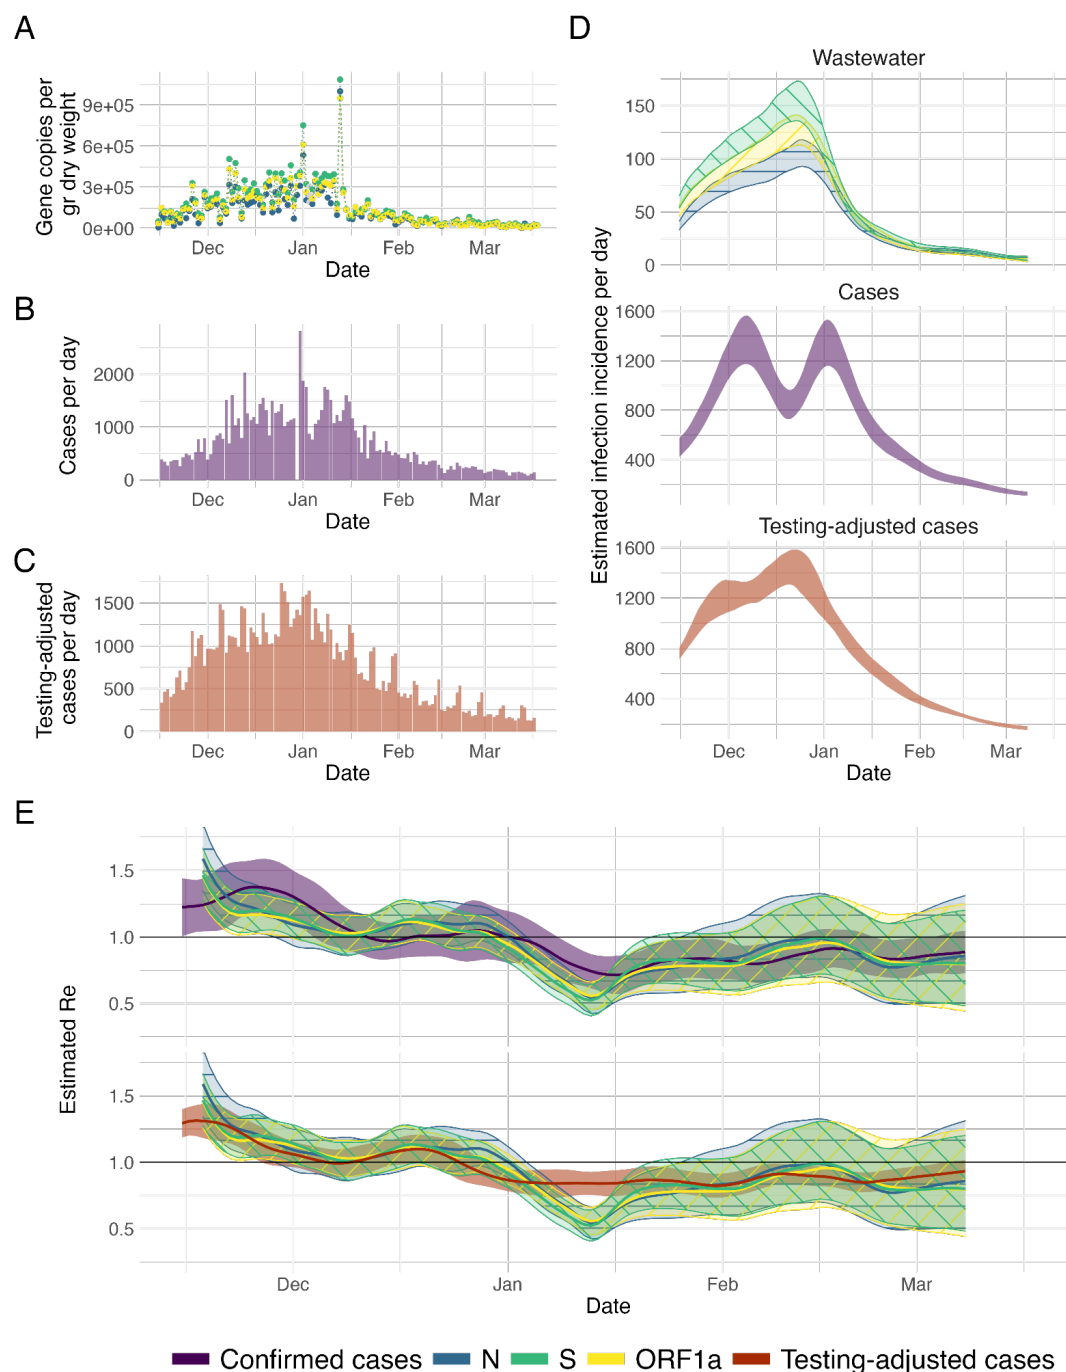

545  
 546 **Fig. 2:  $R_{ww}$  estimation from San Jose (USA) sludge measurements:** (A) Measured RNA  
 547 concentrations of the N, S and ORF1a genes (blue, green, yellow respectively) between 15  
 548 November 2020 and 19 March 2021. (B, C) Confirmed cases and testing-adjusted cases in  
 549 Santa Clara county (purple, red) during the same time period. The testing-adjusted cases

550 describe the number of positive tests / total number of tests per day, normalized by the mean  
551 number of tests per day in Santa Clara county during the study period. (D) The estimated  
552 infection incidence per day from normalized RNA concentrations (top), case reports (middle)  
553 and testing-adjusted cases (bottom). The gene copies per gram dry weight were normalized by  
554 the lowest measured value ( $N \cdot M = 2663.7$  gc/g-dry weight per infection/day). The ribbons  
555 indicate the mean  $\pm$  standard deviation across 1000 bootstrap replicates. (E) The estimated  $R_{ww}$   
556 compared to  $R_{cc}$  from confirmed cases (top) and testing-adjusted cases (bottom). The colored  
557 line indicates the point estimate on the original data, and the ribbons the 95% confidence  
558 interval across 1000 bootstrap replicates.

559

560 **Application to an independent data source and different wastewater matrix.** To test  
561 whether these results could be generalized to different geographic locations and wastewater  
562 matrices, we analyzed daily-sampled primary sewage sludge data from the San Jose  
563 wastewater treatment plant in California.

564

565 In San Jose, the inferred infection incidence curves between confirmed cases and wastewater  
566 data follow similar trends (Fig. 2D). The inferred incidence from confirmed cases rises rapidly,  
567 reaching a maximum and fluctuating at a plateau throughout December. This fluctuation seems  
568 primarily caused by reporting errors on Dec. 30th, as it fully disappears when replacing the 0  
569 cases reported that day by 1000 (Fig. S2). Instead, wastewater estimates continue to rise more  
570 gradually throughout December, similar to the cases adjusted for test-positivity. Starting in late  
571 December, all traces show a similar decrease.

572

573 We found that  $R_{ww}$  agreed with  $R_{cc}$ , although there is again some temporal lag between both,  
574 which seems more pronounced in November/December than in the second half of the time  
575 series (Fig. 2D). The  $R_e$  estimates based on the testing-adjusted cases are more comparable to  
576  $R_{ww}$ , both in terms of slope (especially in December) and a more uniform delay throughout the  
577 entire time period. This further suggests that the  $R_{cc}$  estimates are biased by underreporting and  
578 increased testing delays, and not as trustworthy as  $R_{ww}$  in this case. A comparison between  $R_{cc}$   
579 estimated using different methods (as reported on the website of the California State  
580 Department of Public Health) shows substantially larger differences than between the  
581 wastewater and the confirmed case estimates from the same pipeline (Fig. S3).

582

583 **Minimal Frequency of Wastewater Sampling needed to inform  $R_{ww}$ .** While designing  
584 wastewater-based epidemiology studies, an important cost-benefit trade-off centers around the  
585 frequency of sampling. We subsampled the daily sampled wastewater measurements in Zurich  
586 and San Jose, prior to the  $R_e$  estimation pipeline, to determine how this would affect the  
587 estimated  $R_{ww}$ . We assessed a range of sampling strategies that differed in the number and  
588 identity of the days sampled (e.g. Mon-Wed-Fri or Tue-Fri). For Zurich, we restricted ourselves  
589 to the period with daily sampling (22 November 2020 to 11 January 2021). Using the RMSE to  
590 quantify the similarity between different  $R_{ww}$  estimates, we found that subsampling down to 3  
591 measurements per week still leads to results comparable to a daily sampling regime (Fig. S4,  
592 Table S1, Table S2). However, below this frequency the representativity of the  $R_{ww}$  estimate  
593 starts to depend on which days were sampled.



594

595 **Susceptibility of  $R_{ww}$  estimates to the shedding load distribution.** We showed that  $R_e$  can  
596 be estimated from RNA measurements in wastewater, given an assumption for the SLD.  
597 However, there is substantial variation between SLDs described in the literature, across  
598 patients, bodily fluids, and geographic locations. The shape of the SLD, in particular the mean of  
599 the gamma distribution used, affects the inferred timing of peak infection incidence (with larger  
600 means shifting the incidence further back in time; Fig. S5). In our pipeline, we also observe that  
601 smaller normalization factors  $N \cdot M$  increase the amplitude of the estimated  $R_{ww}$ , albeit only when  
602 mis-specified by more than 5 orders of magnitude (Fig. S6). In principle, the inference of the  $R_e$   
603 point estimate from an infection incidence is independent of the magnitude of this incidence<sup>2,4</sup>.  
604 However, the expectation maximization algorithm used for deconvolution in our pipeline was  
605 optimized for data on the scale of infections per day. Here, we have chosen to normalize the  
606 wastewater measurements such that the considered gene loads are on that same scale, since  
607  $R_{ww}$  otherwise reacts too strongly to changes in the daily incidence.

608

609 **Estimating the shedding load distribution from the fit between clinical and wastewater**  
610 **data.** Instead of assuming a single SLD and estimating  $R_{ww}$  based only on that distribution, we  
611 also asked which SLD would maximize the similarity between the  $R_{ww}$  and  $R_{cc}$  estimates. We  
612 numerically scanned across different SLDs and quantified the resulting goodness of fit between  
613 the  $R_{ww}$  and  $R_{cc}$  for both Zurich and San Jose. We assumed the SLD is described by a single  
614 gamma distribution, starting at infection, and searched for the optimal fit on a grid of mean-  
615 standard deviation parameter pairs (Table 1, Fig. 3). The fit was quantified using the root mean  
616 squared error (RMSE), coverage, and mean absolute percentage error (MAPE). Since the  
617 measurements of the different genetic markers followed nearly identical patterns in both  
618 locations (Figs. 1 and 2), we conducted the SLD optimization analysis only for the N1 marker in  
619 Zurich, and S gene in San Jose.

620

621 The optimal fits based on these metrics suggest that the SLD has a mean between 7-11 days in  
622 Zurich and 5-7 days in San Jose, with a very low standard deviation of 0.5 days in both  
623 locations (Table 1). However, there is some non-identifiability in our analysis, with most optimal  
624 value pairs lying along a ridge (Fig. 3; repeated for coverage: S7, and MAPE: S8). This ridge  
625 corresponds to SLDs with a similar median, which result in nearly indistinguishable  $R_{ww}$   
626 estimates (examples shown in Fig. S9). If we consider the parameters yielding a fit within 10%  
627 from the optimum, the parameter ranges found in both locations are compatible and jointly  
628 suggest an SLD with mean between 6-9 days, and standard deviation between 0.5-3 days.  
629 Longer time series and more locations would further constrain this distribution. Compared to the  
630 delay between infection and case reporting, the SLD introduces a similar or lower mean delay to  
631  $R_{ww}$ . For Zurich, the cases were delayed with respect to infection by 8.1 days on average, which  
632 is comparable to the 6-9 days for  $R_{ww}$ . For San Jose, instead, the delay distribution of the case  
633 report data had a mean of 9.8 days. There, the wastewater may lead the confirmed cases by 1-  
634 4 days, if the current testing and reporting regime is upheld.

635

636 To compare against published SLDs, which are frequently parameterized from symptom onset  
637 instead of infection, we conducted a second analysis. Here we assumed individuals do not shed

638 during their incubation period and subsequently shed with a gamma distribution, starting at  
 639 symptom onset. In this case, we find optimal SLDs with a mean between 0.5-3 days for San  
 640 Jose and 3.5-5.5 days for Zurich (Table S3, Fig. S10). These optimal distributions have a lower  
 641 mean than the SLD reported by Benefield et al. (mean 6.7 days), and Han et al. (mean 4.7  
 642 days)<sup>24,25</sup>. If we add the mean incubation period (5.3 days) to the results of this scan, we find  
 643 that for both locations the mean delay between infection and shedding is comparable to the  
 644 mean of the SLD we estimated from infection.  
 645

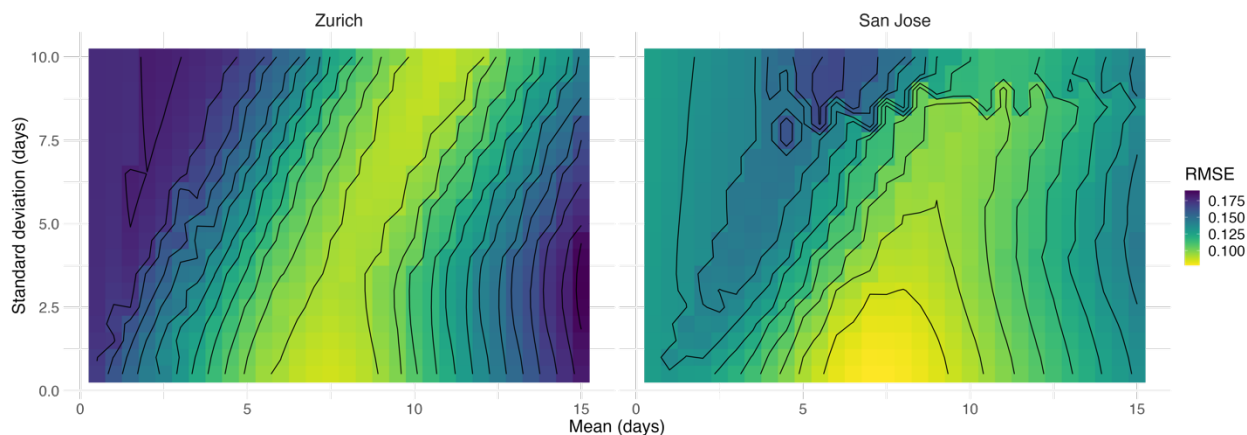

646 **Fig. 3: RMSE between  $R_{cc}$  and  $R_{ww}$  for different shedding load distributions.** We scanned  
 647 across different parameter pairs (mean, standard deviation in days) for the SLD from time since  
 648 infection. For the city of Zurich, the  $R_{ww}$  from N1 loads in wastewater was compared to that of  
 649 confirmed cases in the catchment. For San Jose, we compared S gene concentrations to  
 650 confirmed cases in Santa Clara County. The contour lines show SLD parameter pairs with equal  
 651 RMSE, in steps of 10% of the optimum value.  
 652  
 653

| Comparison Method   | Optimal pair (mean; sd) | Mean within 10% from the optimum | SD within 10% from the optimum |
|---------------------|-------------------------|----------------------------------|--------------------------------|
| RMSE (Zurich)       | (7.5; 0.5)              | [6, 11.5]                        | [0.5, 10]                      |
| Coverage (Zurich)   | (7.5; 0.5)              | [6, 12.5]                        | [0.5, 10]                      |
| MAPE (Zurich)       | (11; 9.5)               | [6.5, 11]                        | [0.5, 10]                      |
| RMSE (San Jose)     | (7.0; 0.5)              | [6, 9]                           | [0.5, 3]                       |
| Coverage (San Jose) | (5; 0.5)                | [1, 11]                          | [0.5, 10]                      |
| MAPE (San Jose)     | (6; 0.5)                | [5, 8]                           | [0.5, 2.5]                     |

654 **Table 1: Parameters of the optimal shedding distribution from infection.** We scanned  
 655 across different (mean, standard deviation) parameter pairs for the SLD from time since  
 656 infection. For Zurich, the  $R_e$  from N1 loads in wastewater was compared to that of confirmed  
 657 cases in the catchment. For San Jose, we compared S gene concentrations to confirmed cases  
 658

659 *in Santa Clara County. For all values of the scan see Figs. 3, S7, S8. All parameters are in units*  
660 *of days. For the coverage, the 95% confidence intervals of  $R_{cc}$  and  $R_{ww}$  were based on 50*  
661 *bootstrap replicates in each comparison.*

662

## 663 **Discussion:**

664 We showed that regular measurements of SARS-CoV-2 concentrations in wastewater and  
665 settled solids can be used to estimate the effective reproductive number  $R_e$ . The difference  
666 between  $R_e$  estimates from wastewater ( $R_{ww}$ ) and from case report data ( $R_{cc}$ ) is similar to the  
667 difference between  $R_e$  estimates based on different types of case report data (clinical cases,  
668 hospitalizations, and deaths). This did not depend on which of the measured gene targets was  
669 used to estimate  $R_{ww}$ . We further showed wastewater samples should be collected at least 3  
670 times per week to reliably estimate past  $R_{ww}$ , in line with analyses based on direct comparison  
671 of wastewater signals to clinical cases<sup>15,38</sup>. For real-time monitoring of  $R_{ww}$ , more frequent  
672 measurements may be preferable to ensure stable estimates when new data comes in.

673

674 Estimating  $R_{ww}$  requires accurate characterization of the SLD, i.e. the temporal dynamics of  
675 shedding. In our primary analysis, we used the distribution for gastrointestinal shedding from  
676 Benefield et al.<sup>25</sup>. In using this SLD, we implicitly assumed that fecal shedding dominates the  
677 viral load in wastewater. However, there is a wide range in published viral shedding loads, and it  
678 is unclear which - if any - accurately capture viral shedding dynamics of people within a  
679 catchment. Virus shed in saliva, sputum, and feces are possible contributors to the total amount  
680 of virus RNA in the wastewater<sup>39</sup>. While upper respiratory tract swabs show peak viral loads  
681 around the day of symptom onset, there are indications that sputum samples peak a few days  
682 later, and feces even after that<sup>40-42</sup>. Studies differ in the inferred timing of peak viral load (even  
683 in the same bodily fluids), and there is a general lack of information to constrain dynamics prior  
684 to symptom onset<sup>43</sup>. Additionally, the duration and magnitude of viral shedding seem to differ  
685 within different populations (for example, due to age or severity of disease)<sup>44,45</sup>. However, these  
686 individual differences will probably average out in a sufficiently large catchment and better  
687 estimates of the SLD are likely to become available as prospective sampling studies report  
688 results.

689

690 We showed that the optimal SLD can also be inferred from the fit between  $R_{ww}$  and  $R_{cc}$ . Once  
691 the SLD has been estimated from historic wastewater and case data, it may from then on  
692 provide a more accurate estimation of  $R_{ww}$ , than using one of the published SLDs. Indeed, here  
693 we show a range of gamma-distributed SLDs inferred from our wastewater data that generally  
694 align with, but have lower means than published SLDs based on patient shedding profiles.  
695 Optimization based on alignment between  $R_{ww}$  and  $R_{cc}$  assumes accuracy of  $R_{cc}$ , which only  
696 holds when there is adequate clinical case surveillance. However, given widespread wastewater  
697 monitoring coincident to clinical case reporting, broader application of our methods would help  
698 constrain the SLD of SARS-CoV-2.

699

700 The utility of wastewater measurements for  $R_e$  estimation is independent of the pipeline used to  
701 estimate  $R_e$ . Here, we report results obtained with the pipeline of Huisman et al.<sup>2</sup>. However,  
702 many estimation methods exist, differing in assumptions on smoothing, deconvolution,

703 uncertainty quantification as well as the underlying method to estimate  $R_e$  from infection  
704 incidence<sup>1,3,7,46,47</sup>. Although the  $R_e$  point estimate is not affected by the absolute magnitude of  
705 the infection incidence (and thus comparable across wastewater treatment plants with differing  
706 sampling protocols), the rest of our pipeline (in particular the deconvolution) was originally  
707 developed specifically for use with clinical data. Thus, we had to normalize the measured  
708 wastewater concentrations to the same order of magnitude as the case data. Further  
709 development could make the method more specifically adapted to wastewater data, and  
710 alleviate this dependence on the normalization.

711  
712 Estimates of  $R_{ww}$  are independent of biases influencing clinical case-based estimates.  $R_{cc}$   
713 estimates are based on only the subset of infections, hospitalizations, and/or deaths that are  
714 captured by surveillance within the healthcare system. If this subset changes, for instance due  
715 to developments in testing or reporting policy, the resulting  $R_{cc}$  estimates will be temporarily  
716 biased<sup>2,4</sup>. In Geneva, Switzerland, seroprevalence studies showed that the number of infections  
717 per reported case varied substantially, from an estimated 11.6 infections per reported case as of  
718 May 2020 to only 2.7 as of December 2020<sup>48,49</sup>. During that period, SARS-CoV-2 RNA  
719 concentrations in wastewater better reflected the dynamics than the clinical cases<sup>22</sup>.

720  
721 However,  $R_{ww}$  estimates are also prone to biases. People's behaviors, such as defecation timing  
722 outside of a daily routine<sup>50</sup> and/or movement into or out of the catchment<sup>51</sup> can influence  $R_{ww}$   
723 estimates, particularly when the number of infected individuals is low. RNA signals may also be  
724 impacted during sewer transport, with persistence influenced by environmental conditions (i.e.,  
725 temperature) and/or sewage composition (i.e., solids content)<sup>52-55</sup>. Furthermore, sample  
726 processing required to quantify SARS-CoV-2 RNA may introduce variation, as suggested by  
727 substantial day-to-day variation in measurements<sup>13,15,22,56</sup>. Finally,  $R_{ww}$  estimates are informed  
728 by the number and proportion of infected and/or shedding people within the catchment: if there  
729 are too few active shedders,  $R_{ww}$  may be very sensitive to the increased fluctuations in SARS-  
730 CoV-2 RNA concentrations.

731  
732 To conclude, deriving  $R_e$  from wastewater offers an independent method to track disease  
733 dynamics. Wastewater-based epidemiology is used globally to track the COVID-19 pandemic  
734 (<https://www.covid19wbec.org/covidpooops19>)<sup>13-19</sup>. The data collected within these campaigns  
735 could be used to estimate  $R_{ww}$  with a robust method, not influenced by heterogeneous testing  
736 and reporting strategies, and hence more comparable across geographic areas. Additionally,  
737  $R_{ww}$  estimates could be derived for the transmission of SARS-CoV-2 variants and/or other  
738 pathogens for which SLDs are known. SARS-CoV-2 variants, including Variants of Concern  
739 (VOCs), are readily detectable in wastewater<sup>57-59</sup> as are other pathogens (e.g., norovirus,  
740 enterovirus, hepatitis A)<sup>60-62</sup>. This could provide the temporal, quantitative wastewater  
741 measurements needed to estimate  $R_{ww}$ . Wastewater surveillance allows estimating  $R_{ww}$  to track  
742 disease transmission dynamics in near-real time, using low cost, rapid, and geographically-  
743 comparable methods, and can be used when reporting clinical cases is not feasible, mandatory,  
744 or much delayed compared to infection and shedding.

745  
746

747

748 **Acknowledgements:**

749 We thank members from the Bonhoeffer and Stadler groups for helpful discussions, Carola  
750 Bänziger (Eawag), Claudia Scheckel (Oncobit AG, Switzerland), and Bruno Mueller and Sergey  
751 Yakushev (Microsynth AG, Switzerland) for assistance with and/or knowledge exchange on  
752 method development. We further thank the operators of the Zurich WWTP for providing  
753 samples; Alexander J. Devaux and Charlie Gan for their help in analyzing the Zurich samples;  
754 the staff of the San Jose WWTP including Payak Sarkar, Noel Enoki, and Amy Wong; the  
755 Health Department of Canton Zurich for catchment-specific case numbers; and the California  
756 Department of Public Health Covid-19 modelling team for input on the Re estimates and  
757 symptom onset to case confirmation delay distribution for the state of California. We thank the  
758 reviewers for their suggestions to improve the manuscript. XFC, TS, CO, TRJ and TK  
759 acknowledge funding from the Swiss National Science foundation (Special Call on  
760 Coronaviruses; 31CA30\_196267 and 31CA30\_196538). CO, TRJ and TK further acknowledge  
761 discretionary funding from Eawag and EPFL. XFC was a fellow of the European Union's  
762 Horizon 2020 research and innovation program under the Marie Skłodowska–Curie Grant  
763 Agreement No. 754462. The San Jose wastewater data acquisition and curation was funded by  
764 the CDC-Foundation.

765

766 **Author contributions:**

767 JSH, TK, CO, TS, TRJ conceived the study; JSH developed the analytical framework, designed  
768 and performed computational analyses; JS, AS, TS contributed to the analytical methods; LC,  
769 XFC, PG, AKu, ES, ABB, BH, AKn, AT, KRW, MKW, TK, CO, TRJ developed experimental  
770 protocols and performed wastewater sampling; XFC, ABB, KRW, TK, CO, TS, TRJ supervised  
771 the study and secured funding; JSH, TK, TRJ wrote the original draft; all authors reviewed and  
772 approved the final manuscript.

773

774

775

## 776 **References:**

- 777 1. Gostic KM, McGough L, Baskerville EB, et al. Practical considerations for measuring the  
778 effective reproductive number, *R*. *PLoS Comput Biol*. 2020;16(12):e1008409.
- 779 2. Huisman JS, Scire J, Angst DC, Neher RA, Bonhoeffer S, Stadler T. Estimation and  
780 worldwide monitoring of the effective reproductive number of SARS-CoV-2. *medrxiv*.  
781 Published online 2020.  
782 <https://www.medrxiv.org/content/10.1101/2020.11.26.20239368v1.abstract>
- 783 3. Wallinga J, Teunis P. Different epidemic curves for severe acute respiratory syndrome  
784 reveal similar impacts of control measures. *Am J Epidemiol*. 2004;160(6):509-516.
- 785 4. Cori A, Ferguson NM, Fraser C, Cauchemez S. A new framework and software to estimate  
786 time-varying reproduction numbers during epidemics. *Am J Epidemiol*. 2013;178(9):1505-  
787 1512.
- 788 5. Brauner JM, Mindermann S, Sharma M, et al. Inferring the effectiveness of government  
789 interventions against COVID-19. *Science*. 2021;371(6531). doi:10.1126/science.abd9338
- 790 6. Der Schweizerische Bundesrat. *Verordnung über Massnahmen in Der Besonderen Lage*  
791 *Zur Bekämpfung Der Covid-19-Epidemie.*; 2020.
- 792 7. Anderson R, Donnelly C, Hollingsworth D, et al. *Reproduction Number (R) and Growth*  
793 *Rate (r) of the COVID-19 Epidemic in the UK: Methods of Estimation, Data Sources,*  
794 *Causes of Heterogeneity, and Use as a Guide in Policy Formulation.* The Royal Society;  
795 2020.
- 796 8. Yabe T, Tsubouchi K, Fujiwara N, Wada T, Sekimoto Y, Ukkusuri SV. Non-compulsory  
797 measures sufficiently reduced human mobility in Tokyo during the COVID-19 epidemic. *Sci*  
798 *Rep*. 2020;10(1):18053.
- 799 9. Pan A, Liu L, Wang C, et al. Association of Public Health Interventions With the  
800 Epidemiology of the COVID-19 Outbreak in Wuhan, China. *JAMA*. 2020;323(19):1915-  
801 1923.
- 802 10. Flaxman S, Mishra S, Gandy A, et al. Estimating the effects of non-pharmaceutical  
803 interventions on COVID-19 in Europe. *Nature*. 2020;584(7820):257-261.
- 804 11. Soltész K, Gustafsson F, Timpka T, et al. The effect of interventions on COVID-19. *Nature*.  
805 2020;588(7839):E26-E28.
- 806 12. Rossen LM, Branum AM, Ahmad FB, Sutton P, Anderson RN. Excess Deaths Associated  
807 with COVID-19, by Age and Race and Ethnicity — United States, January 26–October 3,  
808 2020. *MMWR Morbidity and Mortality Weekly Report*. 2020;69(42):1522-1527.  
809 doi:10.15585/mmwr.mm6942e2
- 810 13. Peccia J, Zulli A, Brackney DE, et al. Measurement of SARS-CoV-2 RNA in wastewater  
811 tracks community infection dynamics. *Nat Biotechnol*. 2020;38(10):1164-1167.
- 812 14. Karthikeyan S, Ronquillo N, Belda-Ferre P, et al. High-Throughput Wastewater SARS-CoV-  
813 2 Detection Enables Forecasting of Community Infection Dynamics in San Diego County.

- 814 *mSystems*. 2021;6(2). doi:10.1128/mSystems.00045-21
- 815 15. Graham KE, Loeb SK, Wolfe MK, et al. SARS-CoV-2 RNA in Wastewater Settled Solids Is  
816 Associated with COVID-19 Cases in a Large Urban Sewershed. *Environ Sci Technol*.  
817 2021;55(1):488-498.
- 818 16. Medema G, Heijnen L, Elsinga G, Italiaander R, Brouwer A. Presence of SARS-  
819 Coronavirus-2 RNA in Sewage and Correlation with Reported COVID-19 Prevalence in the  
820 Early Stage of the Epidemic in The Netherlands. *Environ Sci Technol Lett*. 2020;7(7):511-  
821 516.
- 822 17. Agrawal S, Orschler L, Lackner S. Long-term monitoring of SARS-CoV-2 RNA in  
823 wastewater of the Frankfurt metropolitan area in Southern Germany. *Sci Rep*.  
824 2021;11(1):5372.
- 825 18. Arora S, Nag A, Sethi J, et al. Sewage surveillance for the presence of SARS-CoV-2  
826 genome as a useful wastewater based epidemiology (WBE) tracking tool in India. *Water Sci*  
827 *Technol*. 2020;82(12):2823-2836.
- 828 19. Haramoto E, Malla B, Thakali O, Kitajima M. First environmental surveillance for the  
829 presence of SARS-CoV-2 RNA in wastewater and river water in Japan. *Sci Total Environ*.  
830 2020;737:140405.
- 831 20. Kaplan EH, Wang D, Wang M, Malik AA, Zulli A, Peccia J. Aligning SARS-CoV-2 indicators  
832 via an epidemic model: application to hospital admissions and RNA detection in sewage  
833 sludge. *Health Care Manag Sci*. Published online October 28, 2020. doi:10.1007/s10729-  
834 020-09525-1
- 835 21. McMahan CS, Self S, Rennert L, et al. COVID-19 Wastewater Epidemiology: A Model to  
836 Estimate Infected Populations. *MedRxiv*. Published online 2020.  
837 <https://www.medrxiv.org/content/10.1101/2020.11.05.20226738v1.abstract>
- 838 22. Fernandez-Cassi X, Scheidegger A, Bänziger C, et al. Wastewater monitoring outperforms  
839 case numbers as a tool to track COVID-19 incidence dynamics when test positivity rates  
840 are high. doi:10.1101/2021.03.25.21254344
- 841 23. Wölfel R, Corman VM, Guggemos W, et al. Virological assessment of hospitalized patients  
842 with COVID-2019. *Nature*. 2020;581(7809):465-469.
- 843 24. Han MS, Seong MW, Kim N, et al. Viral RNA Load in Mildly Symptomatic and  
844 Asymptomatic Children with COVID-19, Seoul, South Korea. *Emerg Infect Dis*.  
845 2020;26(10):2497-2499.
- 846 25. Benefield AE, Skrip LA, Clement A, Althouse RA, Chang S, Althouse BM. SARS-CoV-2  
847 viral load peaks prior to symptom onset: a systematic review and individual-pooled analysis  
848 of coronavirus viral load from 66 studies. *medRxiv*. Published online 2020.  
849 <https://www.medrxiv.org/content/10.1101/2020.09.28.20202028v1.abstract>
- 850 26. Li Q, Guan X, Wu P, et al. Early Transmission Dynamics in Wuhan, China, of Novel  
851 Coronavirus-Infected Pneumonia. *N Engl J Med*. 2020;382(13):1199-1207.
- 852 27. Symonds EM, Nguyen KH, Harwood VJ, Breitbart M. Pepper mild mottle virus: A plant

- 853 pathogen with a greater purpose in (waste)water treatment development and public health  
854 management. *Water Res.* 2018;144:1-12.
- 855 28. Topol A, Wolfe M, White B, Wigginton K, Boehm A. High Throughput pre-analytical  
856 processing of wastewater settled solids for SARS-CoV-2 RNA analyses v1  
857 (protocols.io.btyqnpvw). *protocols.io*. Published online 2021.  
858 doi:10.17504/protocols.io.btyqnpvw
- 859 29. Topol A, Wolfe M, Wigginton K, White B, Boehm A. High Throughput RNA Extraction and  
860 PCR Inhibitor Removal of Settled Solids for Wastewater Surveillance of SARS-CoV-2 RNA  
861 v1 (protocols.io.btyrnpv6). *protocols.io*. Published online 2021.  
862 doi:10.17504/protocols.io.btyrnpv6
- 863 30. Topol A, Wolfe M, White B, Wigginton K, Boehm A. High Throughput SARS-COV-2,  
864 PMMOV, and BCoV quantification in settled solids using digital RT-PCR v1  
865 (protocols.io.btywnpxe). *protocols.io*. Published online 2021.  
866 doi:10.17504/protocols.io.btywnpxe
- 867 31. Wolfe MK, Topol A, Knudson A, et al. High-Frequency, High-Throughput Quantification of  
868 SARS-CoV-2 RNA in Wastewater Settled Solids at Eight Publicly Owned Treatment Works  
869 in Northern California Shows Strong Association with COVID-19 Incidence. *mSystems*.  
870 2021;6(5):e0082921.
- 871 32. Zhu K, Suttner B, Pickering A, Konstantinidis KT, Brown J. A novel droplet digital PCR  
872 human mtDNA assay for fecal source tracking. *Water Res.* 2020;183:116085.
- 873 33. Huggett JF, Novak T, Garson JA, et al. Differential susceptibility of PCR reactions to  
874 inhibitors: an important and unrecognised phenomenon. *BMC Res Notes*. 2008;1:70.
- 875 34. Haramoto E, Kitajima M, Kishida N, et al. Occurrence of pepper mild mottle virus in drinking  
876 water sources in Japan. *Appl Environ Microbiol.* 2013;79(23):7413-7418.
- 877 35. Zhang T, Breitbart M, Lee WH, et al. RNA Viral Community in Human Feces: Prevalence of  
878 Plant Pathogenic Viruses. *PLoS Biol.* 2005;4(1):e3.
- 879 36. Linton NM, Kobayashi T, Yang Y, et al. Incubation period and other epidemiological  
880 characteristics of 2019 novel Coronavirus infections with right truncation: A statistical  
881 analysis of publicly available case data. *J Clin Med Res.* 2020;9(2):538.
- 882 37. Cori A, Cauchemez S, Ferguson NM, et al. EpiEstim: estimate time varying reproduction  
883 numbers from epidemic curves. *R package version*. Published online 2019:2-2.
- 884 38. Feng S, Roguet A, McClary-Gutierrez JS, et al. Evaluation of sampling frequency and  
885 normalization of SARS-CoV-2 wastewater concentrations for capturing COVID-19 burdens  
886 in the community. *medRxiv*. Published online 2021.  
887 <https://www.medrxiv.org/content/10.1101/2021.02.17.21251867v2.abstract>
- 888 39. Kitajima M, Ahmed W, Bibby K, et al. SARS-CoV-2 in wastewater: State of the knowledge  
889 and research needs. *Sci Total Environ.* 2020;739:139076.
- 890 40. Cevik M, Tate M, Lloyd O, Maraolo AE, Schafers J, Ho A. SARS-CoV-2, SARS-CoV, and  
891 MERS-CoV viral load dynamics, duration of viral shedding, and infectiousness: a



- 892 systematic review and meta-analysis. *Lancet Microbe*. 2021;2(1):e13-e22.
- 893 41. Zheng S, Fan J, Yu F, et al. Viral load dynamics and disease severity in patients infected  
894 with SARS-CoV-2 in Zhejiang province, China, January-March 2020: retrospective cohort  
895 study. *BMJ*. 2020;369:m1443.
- 896 42. Walsh KA, Jordan K, Clyne B, et al. SARS-CoV-2 detection, viral load and infectivity over  
897 the course of an infection. *J Infect*. 2020;81(3):357-371.
- 898 43. Hoffmann T, Alsing J. Faecal shedding models for SARS-CoV-2 RNA amongst hospitalised  
899 patients and implications for wastewater-based epidemiology. *medRxiv*. Published online  
900 2021. <https://www.medrxiv.org/content/10.1101/2021.03.16.21253603v1.abstract>
- 901 44. Liu Y, Yan LM, Wan L, et al. Viral dynamics in mild and severe cases of COVID-19. *Lancet*  
902 *Infect Dis*. 2020;20(6):656-657.
- 903 45. Zhou C, Zhang T, Ren H, et al. Impact of age on duration of viral RNA shedding in patients  
904 with COVID-19. *Aging*. 2020;12(22):22399-22404.
- 905 46. Parag KV. Improved estimation of time-varying reproduction numbers at low case incidence  
906 and between epidemic waves. *medRxiv*. Published online 2020.  
907 <https://www.medrxiv.org/content/10.1101/2020.09.14.20194589v1.abstract>
- 908 47. Abbott S, Hellewell J, Thompson RN, et al. Estimating the time-varying reproduction  
909 number of SARS-CoV-2 using national and subnational case counts. *Wellcome Open*  
910 *Research*. 2020;5:112. doi:10.12688/wellcomeopenres.16006.1
- 911 48. Stringhini S, Wisniak A, Piumatti G, et al. Seroprevalence of anti-SARS-CoV-2 IgG  
912 antibodies in Geneva, Switzerland (SEROCoV-POP): a population-based study. *Lancet*.  
913 2020;396(10247):313-319.
- 914 49. Stringhini S, Zaballa ME, Perez-Saez J, et al. Seroprevalence of anti-SARS-CoV-2  
915 antibodies after the second pandemic peak. *The Lancet Infectious Diseases*. Published  
916 online 2021. doi:10.1016/s1473-3099(21)00054-2
- 917 50. Heaton KW, Radvan J, Cripps H, Mountford RA, Braddon FE, Hughes AO. Defecation  
918 frequency and timing, and stool form in the general population: a prospective study. *Gut*.  
919 1992;33(6):818-824.
- 920 51. Thomas KV, Amador A, Baz-Lomba JA, Reid M. Use of Mobile Device Data To Better  
921 Estimate Dynamic Population Size for Wastewater-Based Epidemiology. *Environ Sci*  
922 *Technol*. 2017;51(19):11363-11370.
- 923 52. Kantor RS, Nelson KL, Greenwald HD, Kennedy LC. Challenges in Measuring the  
924 Recovery of SARS-CoV-2 from Wastewater. *Environ Sci Technol*. 2021;55(6):3514-3519.
- 925 53. de Oliveira LC, Torres-Franco AF, Lopes BC, et al. Viability of SARS-CoV-2 in river water  
926 and wastewater at different temperatures and solids content. *Water Res*. 2021;195:117002.
- 927 54. Bivins A, Greaves J, Fischer R, et al. Persistence of SARS-CoV-2 in Water and  
928 Wastewater. *Environ Sci Technol Lett*. 2020;7(12):937-942.
- 929 55. Hokajärvi AM, Rytönen A, Tiwari A, et al. The detection and stability of the SARS-CoV-2

- 930 RNA biomarkers in wastewater influent in Helsinki, Finland. *Sci Total Environ.*  
931 2021;770:145274.
- 932 56. Gerrity D, Papp K, Stoker M, Sims A, Frehner W. Early-pandemic wastewater surveillance  
933 of SARS-CoV-2 in Southern Nevada: Methodology, occurrence, and incidence/prevalence  
934 considerations. *Water Res X.* 2021;10:100086.
- 935 57. Jahn K, Dreifuss D, Topolsky I, et al. Detection of SARS-CoV-2 variants in Switzerland by  
936 genomic analysis of wastewater samples. *medRxiv.* Published online 2021.  
937 <https://www.medrxiv.org/content/10.1101/2021.01.08.21249379v1.abstract>
- 938 58. Crits-Christoph A, Kantor RS, Olm MR, et al. Genome Sequencing of Sewage Detects  
939 Regionally Prevalent SARS-CoV-2 Variants. *MBio.* 2021;12(1). doi:10.1128/mBio.02703-20
- 940 59. Martin J, Klapsa D, Wilton T, et al. Tracking SARS-CoV-2 in Sewage: Evidence of Changes  
941 in Virus Variant Predominance during COVID-19 Pandemic. *Viruses.* 2020;12(10).  
942 doi:10.3390/v12101144
- 943 60. Brinkman NE, Fout GS, Keely SP. Retrospective Surveillance of Wastewater To Examine  
944 Seasonal Dynamics of Enterovirus Infections. *mSphere.* 2017;2(3).  
945 doi:10.1128/mSphere.00099-17
- 946 61. Kazama S, Masago Y, Tohma K, et al. Temporal dynamics of norovirus determined through  
947 monitoring of municipal wastewater by pyrosequencing and virological surveillance of  
948 gastroenteritis cases. *Water Res.* 2016;92:244-253.
- 949 62. McCall C, Wu H, Miyani B, Xagorarakis I. Identification of multiple potential viral diseases in  
950 a large urban center using wastewater surveillance. *Water Res.* 2020;184:116160.
- 951 63. dMIQE Group, Huggett JF. The Digital MIQE Guidelines Update: Minimum Information for  
952 Publication of Quantitative Digital PCR Experiments for 2020. *Clin Chem.* 2020;66(8):1012-  
953 1029.
- 954

955 **Supplemental Material:**  
956

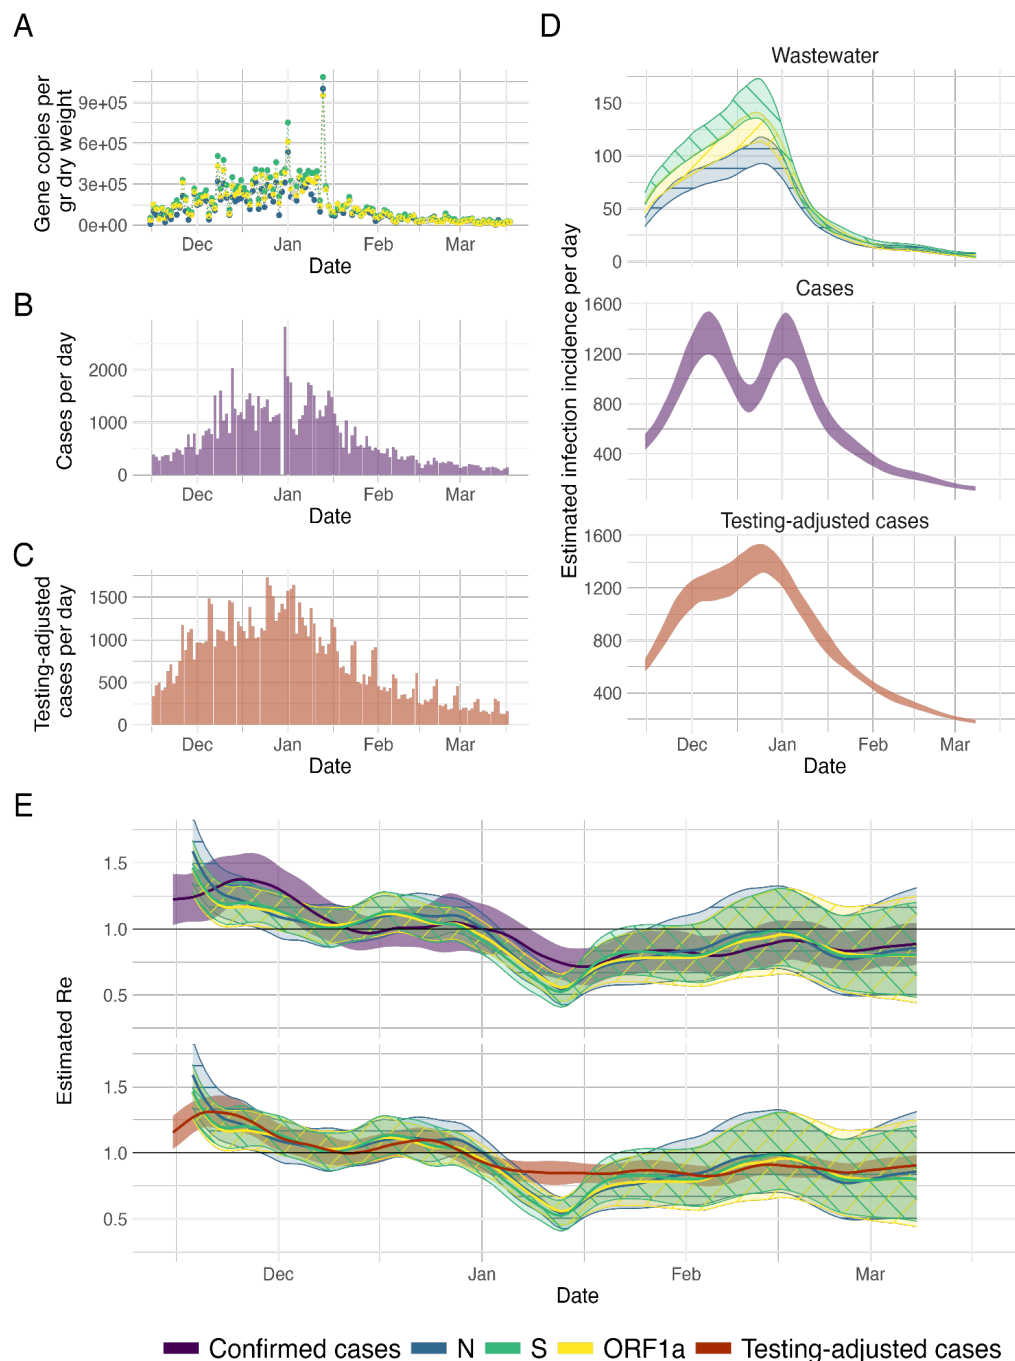

957  
958 Fig. S1:  $R_{ww}$  estimation from San Jose (USA) sludge measurements, assuming zero delay  
959 between symptom onset and testing: (A) Measured RNA concentrations of the N, S and ORF1a  
960 genes (blue, green, yellow respectively) between 15 November 2020 and 19 March 2021. (B, C)  
961 Confirmed cases and testing-adjusted cases in Santa Clara county (purple, red) during the  
962 same time period. The testing-adjusted cases describe the number of positive tests / total  
963 number of tests per day, normalized by the mean number of tests per day in Santa Clara county

964 during the study period. In contrast to Fig. 2 in the main text, the delay between symptom onset  
965 and testing was assumed 0, rather than the same as for case reporting. (D) The estimated  
966 infection incidence per day from normalized RNA concentrations (top), case reports (middle)  
967 and testing-adjusted cases (bottom). The gene copies per gram dry weight were normalized by  
968 the lowest measured value ( $N \cdot M = 2663.7$  gc/g-dry weight per infection/day). The ribbons  
969 indicate the mean  $\pm$  standard deviation across 1000 bootstrap replicates. (E) The estimated  $R_{ww}$   
970 compared to  $R_{cc}$  from confirmed cases (top) and testing-adjusted cases (bottom). The colored  
971 line indicates the point estimate on the original data, and the ribbons the 95% confidence  
972 interval across 1000 bootstrap replicates.  
973

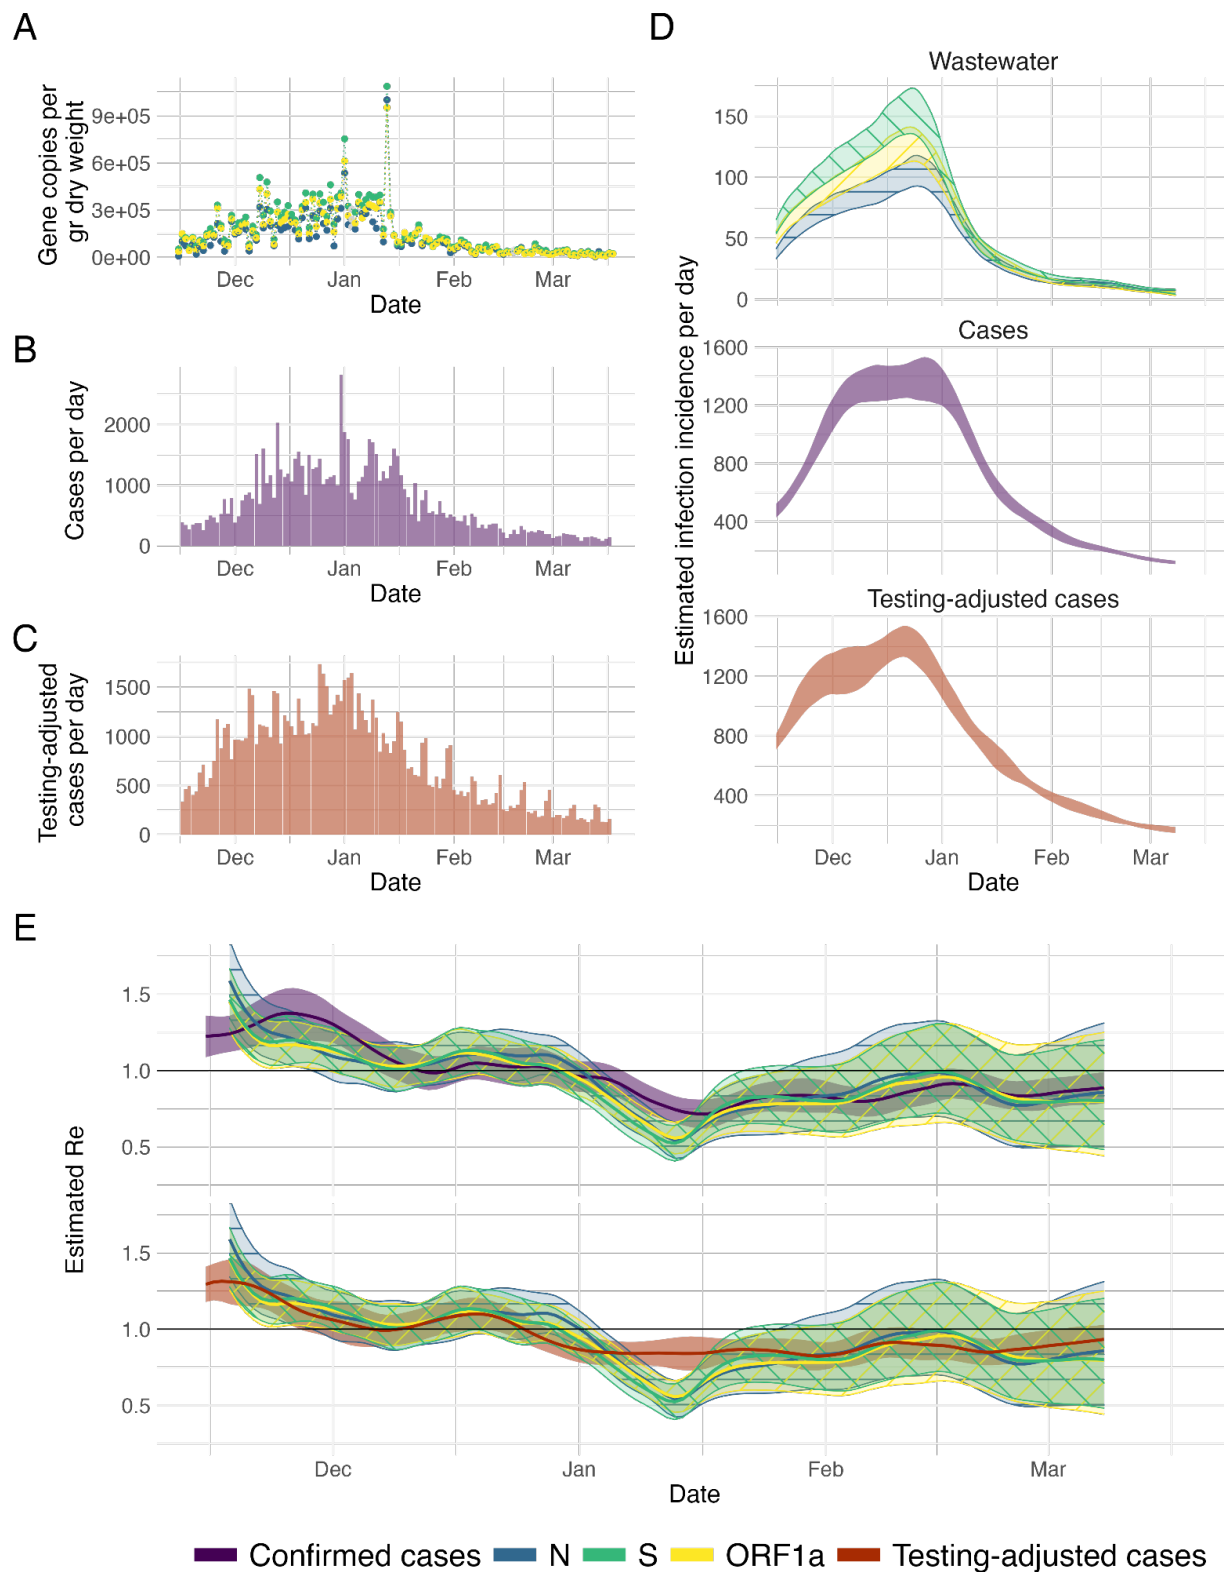

974  
 975 Fig. S2:  $R_{ww}$  estimation from San Jose (USA) sludge measurements, accounting for case  
 976 reporting errors: (A) Measured RNA concentrations of the N, S and ORF1a genes (blue, green,  
 977 yellow respectively) between 15 November 2020 and 19 March 2021. (B, C) Confirmed cases

978 and testing-adjusted cases in Santa Clara county (purple, red) during the same time period. In  
979 contrast to Fig. 2 in the main text, the missing cases on Dec. 30th were set to 1000 in panel (B).  
980 The testing-adjusted cases describe the number of positive tests / total number of tests per day,  
981 normalized by the mean number of tests per day in Santa Clara county during the study period.  
982 (D) The estimated infection incidence per day from normalized RNA concentrations (top), case  
983 reports (middle) and testing-adjusted cases (bottom). The gene copies per gram dry weight  
984 were normalized by the lowest measured value ( $N \cdot M = 2663.7$  gc/g-dry weight per  
985 infection/day). The ribbons indicate the mean  $\pm$  standard deviation across 1000 bootstrap  
986 replicates. (E) The estimated  $R_{ww}$  compared to  $R_{cc}$  from confirmed cases (top) and testing-  
987 adjusted cases (bottom). The colored line indicates the point estimate on the original data, and  
988 the ribbons the 95% confidence interval across 1000 bootstrap replicates.

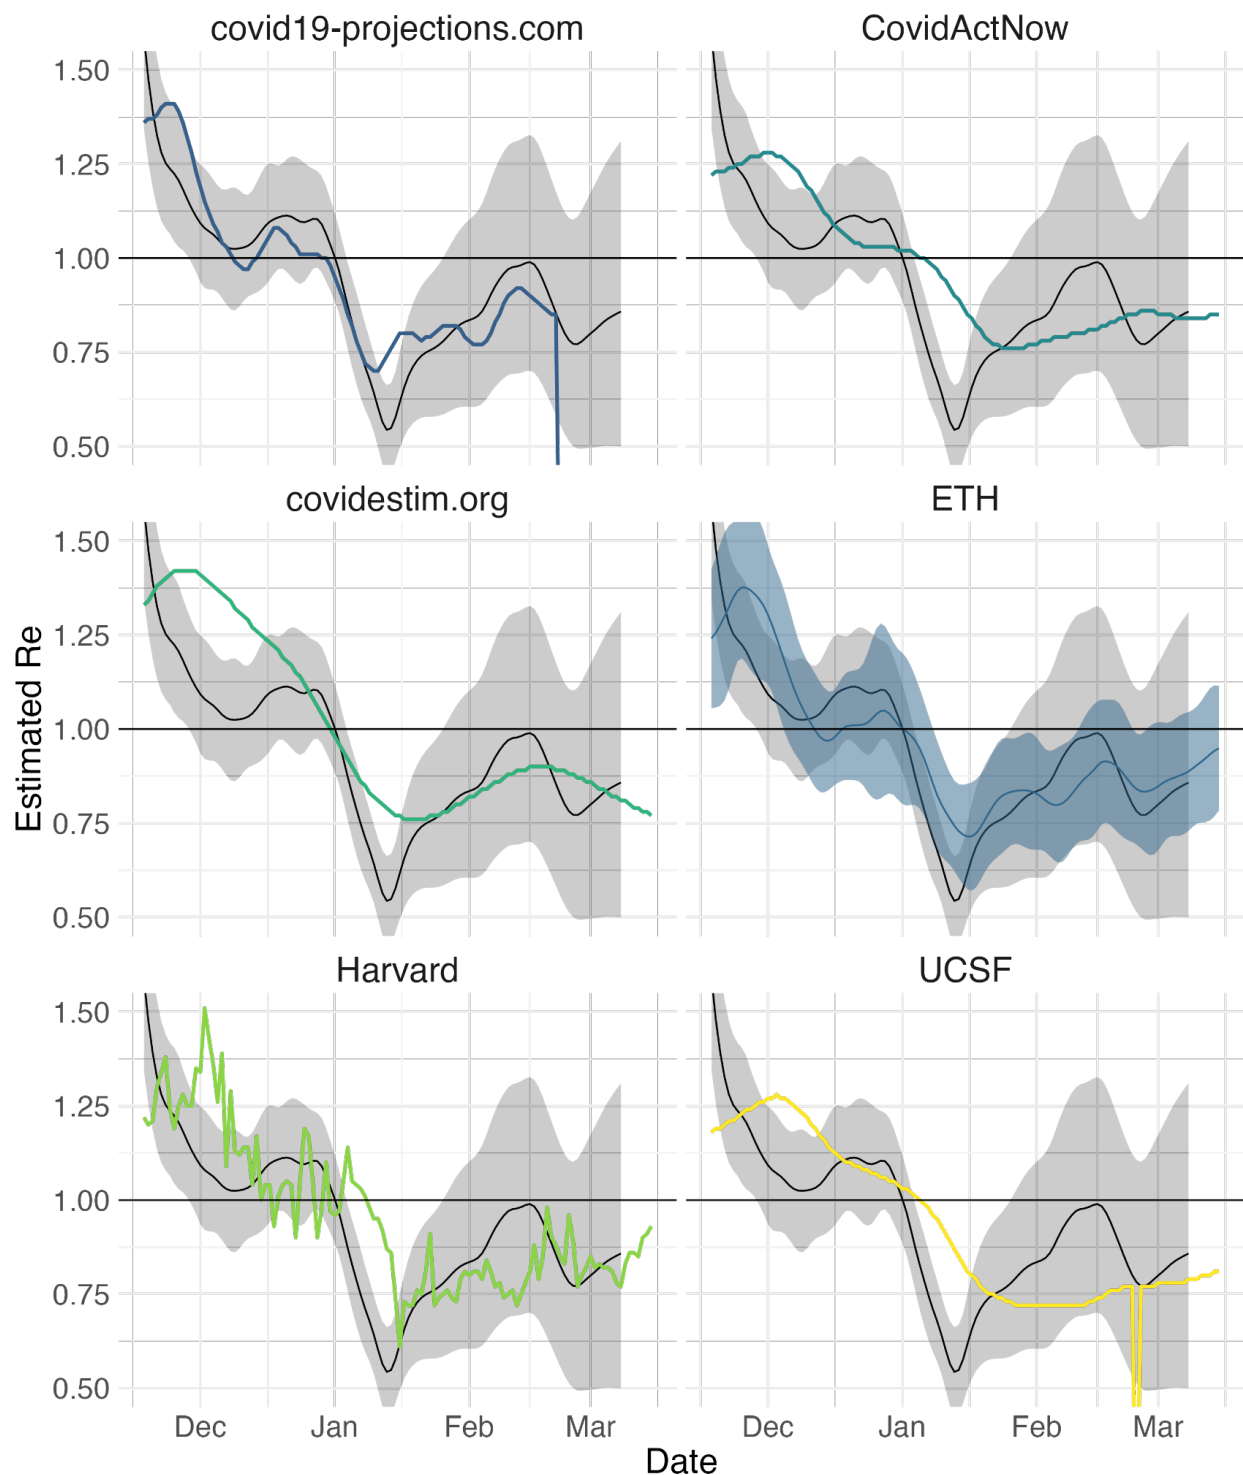

989  
 990 **Fig. S3: The estimated  $R_{ww}$  based on N gene measurements in San Jose (black line, grey**  
 991 **95% confidence intervals) compared to different  $R_{cc}$  estimates for Santa Clara county**  
 992 **from the California COVID assessment tool (CalCat). The  $R_{ww}$  estimate from Fig. 2D was**  
 993 **compared to 6 methods to estimate  $R_{cc}$ , indicated by the color and panel title. “ETH” refers to**  
 994 **the pipeline of Huisman et al. <sup>2</sup> applied to the daily confirmed case data from Santa Clara**

995 county, i.e. the same comparison as shown in Fig. 2D. We excluded the SEIR model based  
 996 estimates included on the CalCat website (since these performed visibly worse than the other  
 997 methods).

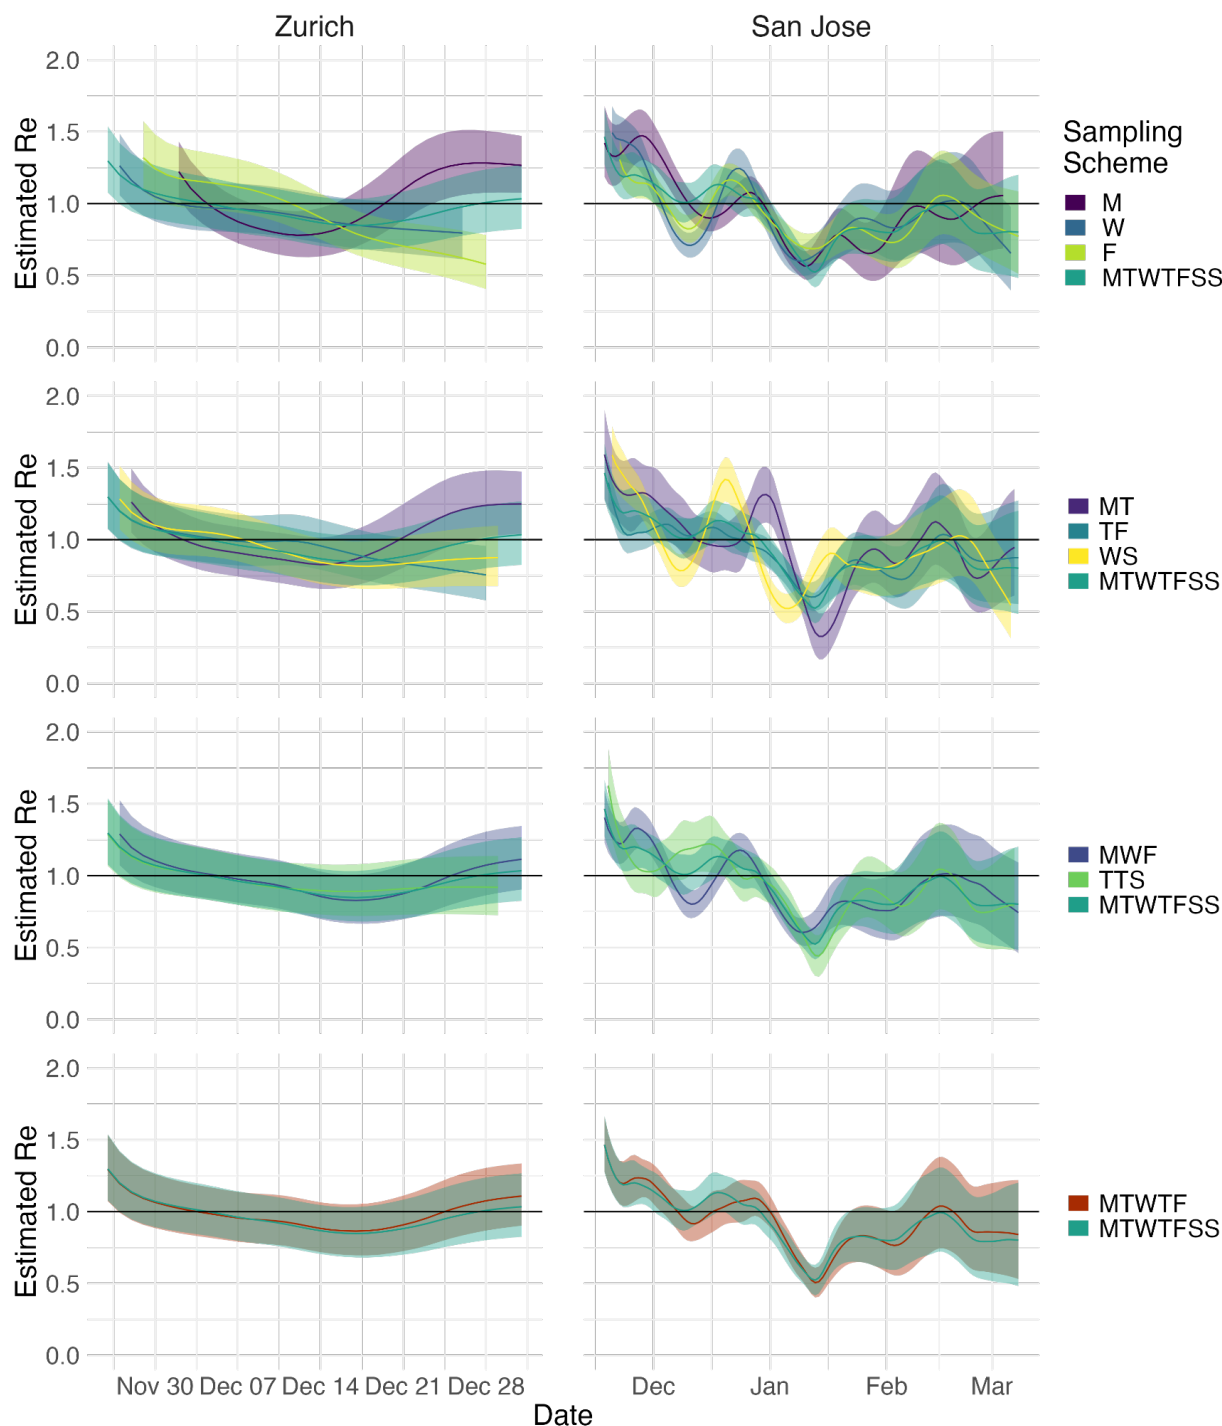

998  
 999 **Fig. S4: The effect of sampling frequency on the  $R_{ww}$  estimates in Zurich and San Jose.**  
 1000 **The data stems from measurements of the N1 marker for Zurich between 2020-11-22 and**  
 1001 **2021-01-11, and the S gene for San Jose between 2020-11-15 and 2021-03-19. The row**  
 1002 **indicates the number of samples taken per week (1, 2, 3, 5), while the colors indicate the**



1003 sampling schedule: MTWTFSS corresponds to daily sampling, MTWTF sampling during the  
 1004 working week, MWF Mon-Wed-Fri, TTS Tue-Thu-Sat, MT Mon-Thu, TF Tue-Fri, WS Wed-Sat,  
 1005 M Monday, W Wednesday, F Friday. The colored line indicates the point estimate on the  
 1006 original data, and the ribbons the 95% confidence interval across 1000 bootstrap replicates.

1007  
 1008 **Table S1: The match between the daily and further subsampled  $R_{ww}$  traces for Zurich.** The  
 1009 data stems from measurements of the N1 marker for Zurich between 2020-11-22 and 2021-01-  
 1010 11. All traces are compared to the daily sampling; MTWTF corresponds to sampling during the  
 1011 working week, MWF Mon-Wed-Fri, TTS Tue-Thu-Sat, MT Mon-Thu, TF Tue-Fri, WS Wed-Sat,  
 1012 M Monday, W Wednesday, F Friday.

1013

|          | MTWTF | MWF  | TTS  | MT   | TF   | WS   | M    | W    | F    |
|----------|-------|------|------|------|------|------|------|------|------|
| RMSE     | 0.03  | 0.04 | 0.03 | 0.12 | 0.09 | 0.06 | 0.17 | 0.06 | 0.18 |
| Coverage | 1.00  | 0.97 | 0.94 | 0.78 | 0.83 | 0.92 | 0.53 | 0.83 | 0.61 |
| MAPE     | 0.02  | 0.03 | 0.02 | 0.09 | 0.07 | 0.05 | 0.12 | 0.04 | 0.17 |

1014

1015 **Table S2: The match between the daily and further subsampled  $R_{ww}$  traces for San Jose.**  
 1016 The data stems from the S gene measurements for San Jose. All traces are compared to the  
 1017 daily sampling; MTWTF corresponds to sampling during the working week, MWF Mon-Wed-Fri,  
 1018 TTS Tue-Thu-Sat, MT Mon-Thu, TF Tue-Fri, WS Wed-Sat, M Monday, W Wednesday, F Friday.

1019

|          | MTWTF | MWF  | TTS  | MT   | TF   | WS   | M    | W    | F    |
|----------|-------|------|------|------|------|------|------|------|------|
| RMSE     | 0.05  | 0.09 | 0.08 | 0.15 | 0.06 | 0.16 | 0.13 | 0.13 | 0.08 |
| Coverage | 0.95  | 0.88 | 0.91 | 0.83 | 0.93 | 0.60 | 0.76 | 0.68 | 0.84 |
| MAPE     | 0.05  | 0.08 | 0.07 | 0.15 | 0.06 | 0.14 | 0.11 | 0.11 | 0.07 |

1020

1021

1022

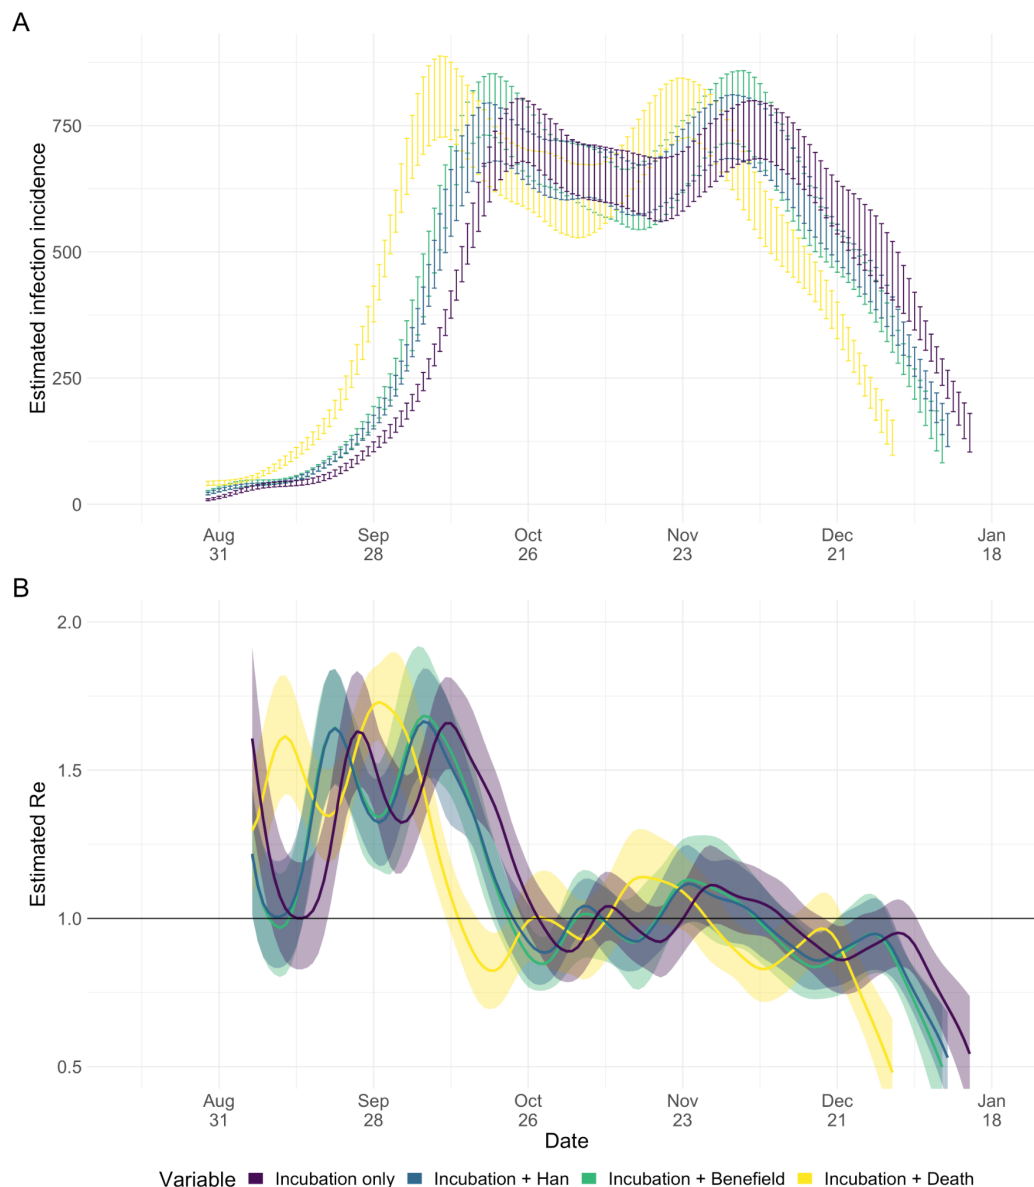

1023  
1024 **Fig. S5: The impact of the shedding load distribution on (A) the inferred infection**  
1025 **incidence and (B)  $R_{ww}$  estimation from the Zurich wastewater data.** The results are  
1026 compared for four SLDs (see Methods): the Benefield SLD upon symptom onset (Incubation +  
1027 Benefield)<sup>25</sup>, the Han SLD upon symptom onset (Incubation + Han)<sup>24,25</sup>, shedding only on the  
1028 day of symptom onset (Incubation only), shedding only on the day of death (Incubation + Death)  
1029 <sup>36</sup>. The error bars (A; mean  $\pm$  standard deviation) and 95% confidence intervals (B) are based  
1030 on 50 bootstrap replicates per condition.  
1031

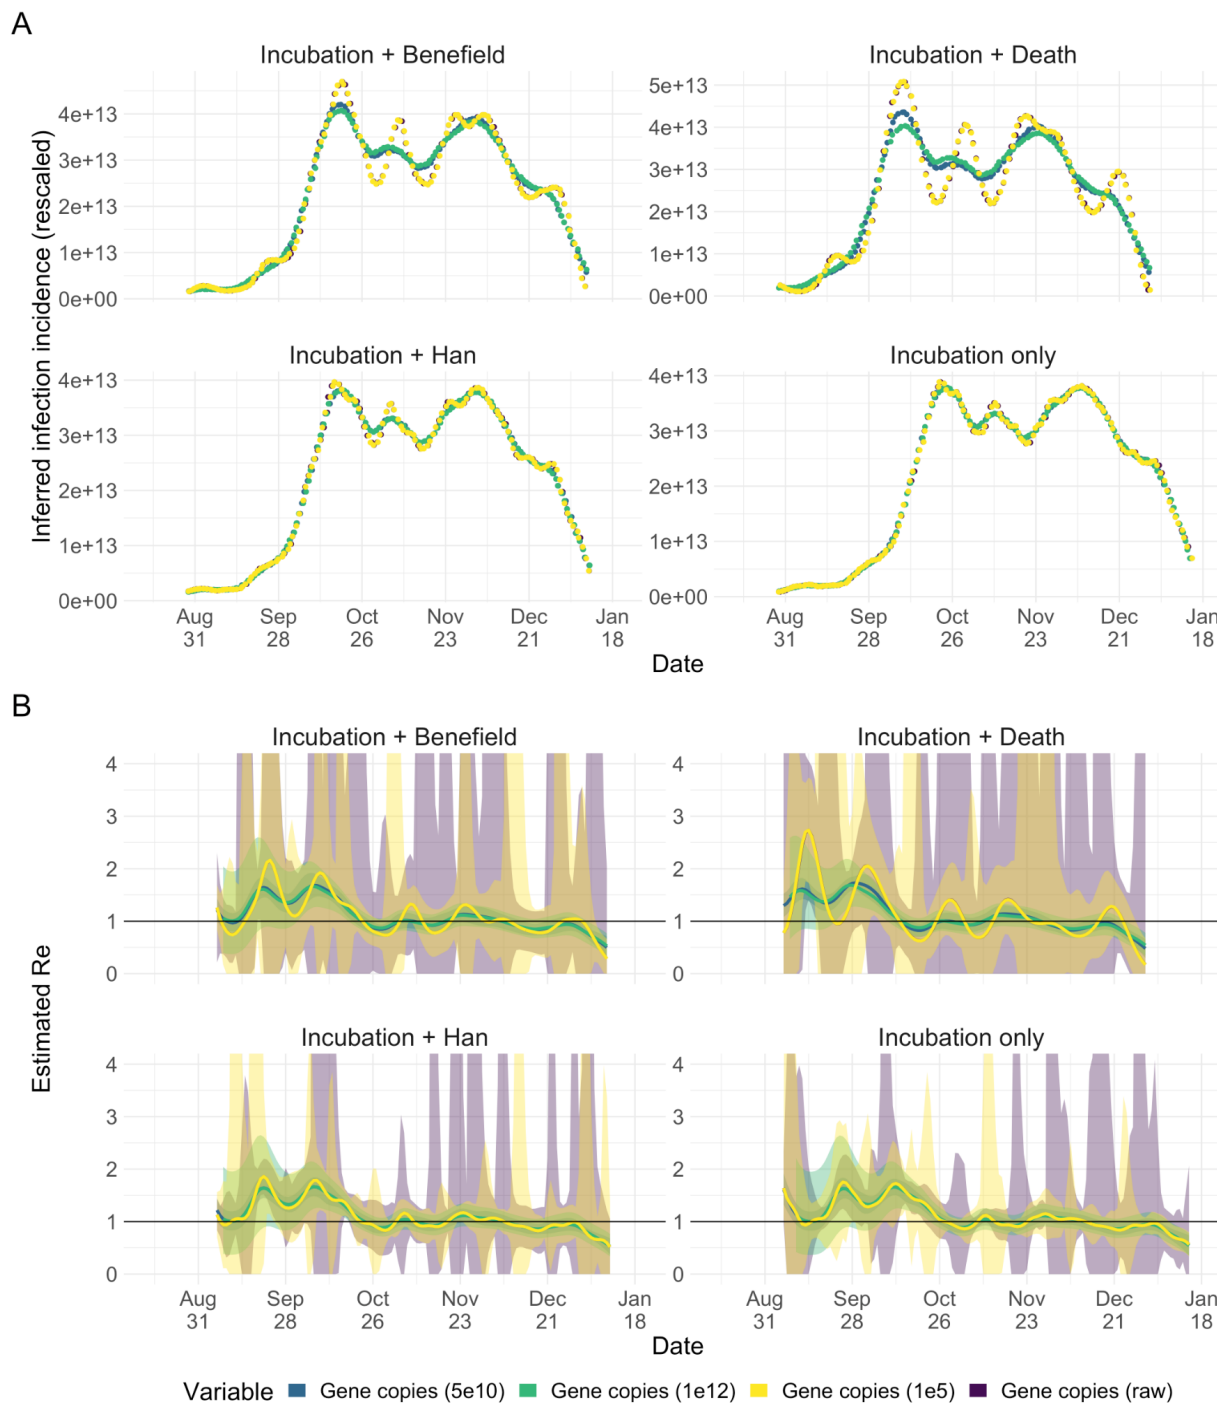

1032  
 1033 **Fig. S6: The effect of data normalization on the estimated  $R_{ww}$  in Zurich.** We calculated  $R_{ww}$   
 1034 from the measured N1 marker indicating the N gene copy loads, normalized in four different  
 1035 ways: by  $1 \times 10^{12}$  gc per infection (the order of magnitude of the lowest measured concentration),  
 1036 by  $5 \times 10^{10}$  gc per infection (roughly rescaled to case incidence), by  $1 \times 10^5$  gc per infection (to  
 1037 cover the space of possible orders of magnitude), no normalization. **(A)** After normalization the  
 1038 measurements were deconvolved, and rescaled back to the original magnitude (multiplied by  
 1039 the normalization factor) to illustrate differences in the inferred infection incidence. **(B)** The

1040 resulting  $R_{ww}$  estimates differ both in the mean (due to the deconvolution illustrated in A) and  
1041 width of the uncertainty interval. The results are compared for four SLDs (panels; see Methods):  
1042 the Benefield SLD upon symptom onset (Incubation + Benefield)<sup>25</sup>, the Han SLD upon  
1043 symptom onset (Incubation + Han)<sup>24,25</sup>, shedding only on the day of symptom onset (Incubation  
1044 only), shedding only on the day of death (Incubation + Death)<sup>36</sup>. The 95% confidence intervals  
1045 (B) are based on 50 bootstrap replicates per condition.  
1046

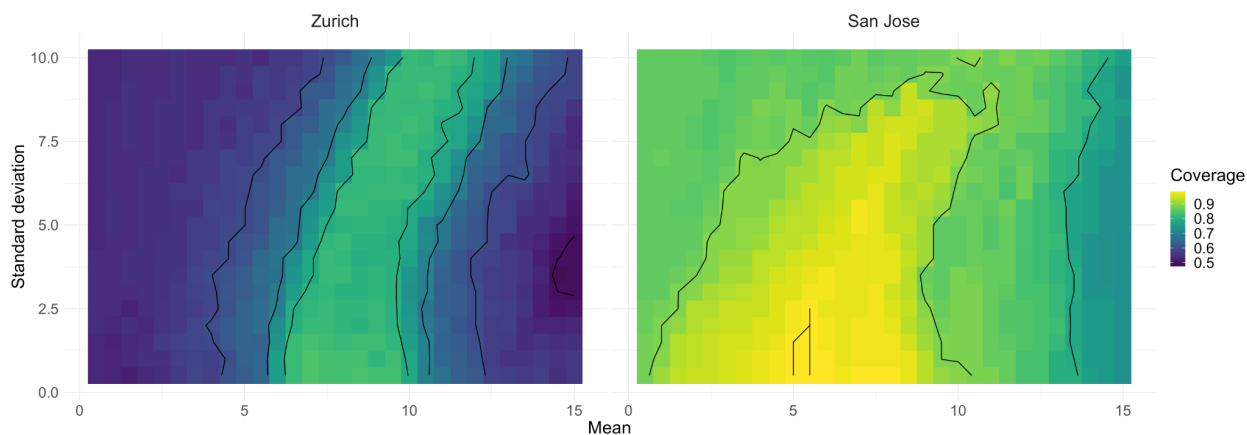

1047 **Fig. S7: Coverage between  $R_{cc}$  and  $R_{ww}$  for different shedding load distributions.** We  
1048 scanned across different parameter pairs (mean, standard deviation in days) for the SLD from  
1049 time since infection. For the city of Zurich, the  $R_{ww}$  from N1 loads in wastewater was compared  
1050 to that of confirmed cases in the catchment. For San Jose, we compared S gene concentrations  
1051 to confirmed cases in Santa Clara County. The contour lines show SLD parameter pairs with  
1052 equal coverage, in steps of 10% of the optimum value. In each comparison (grid-point) the 95%  
1053 confidence intervals of  $R_{cc}$  and  $R_{ww}$  are based on 50 bootstrap replicates.  
1054  
1055

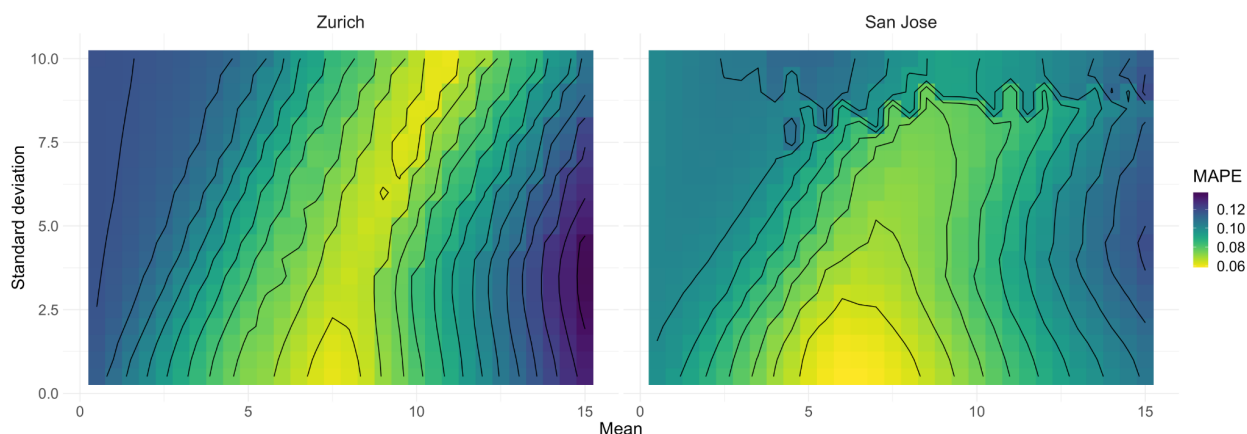

1056 **Fig. S8: MAPE between  $R_{cc}$  and  $R_{ww}$  for different shedding load distributions.** We scanned  
1057 across different parameter pairs (mean, standard deviation in days) for the SLD from  
1058 time since infection. For the city of Zurich, the  $R_{ww}$  from N1 loads in wastewater was compared to that of  
1059 confirmed cases in the catchment. For San Jose, we compared S gene concentrations to  
1060 confirmed cases in Santa Clara County. The contour lines show SLD parameter pairs with equal  
1061 MAPE, in steps of 10% of the optimum value.  
1062

1063

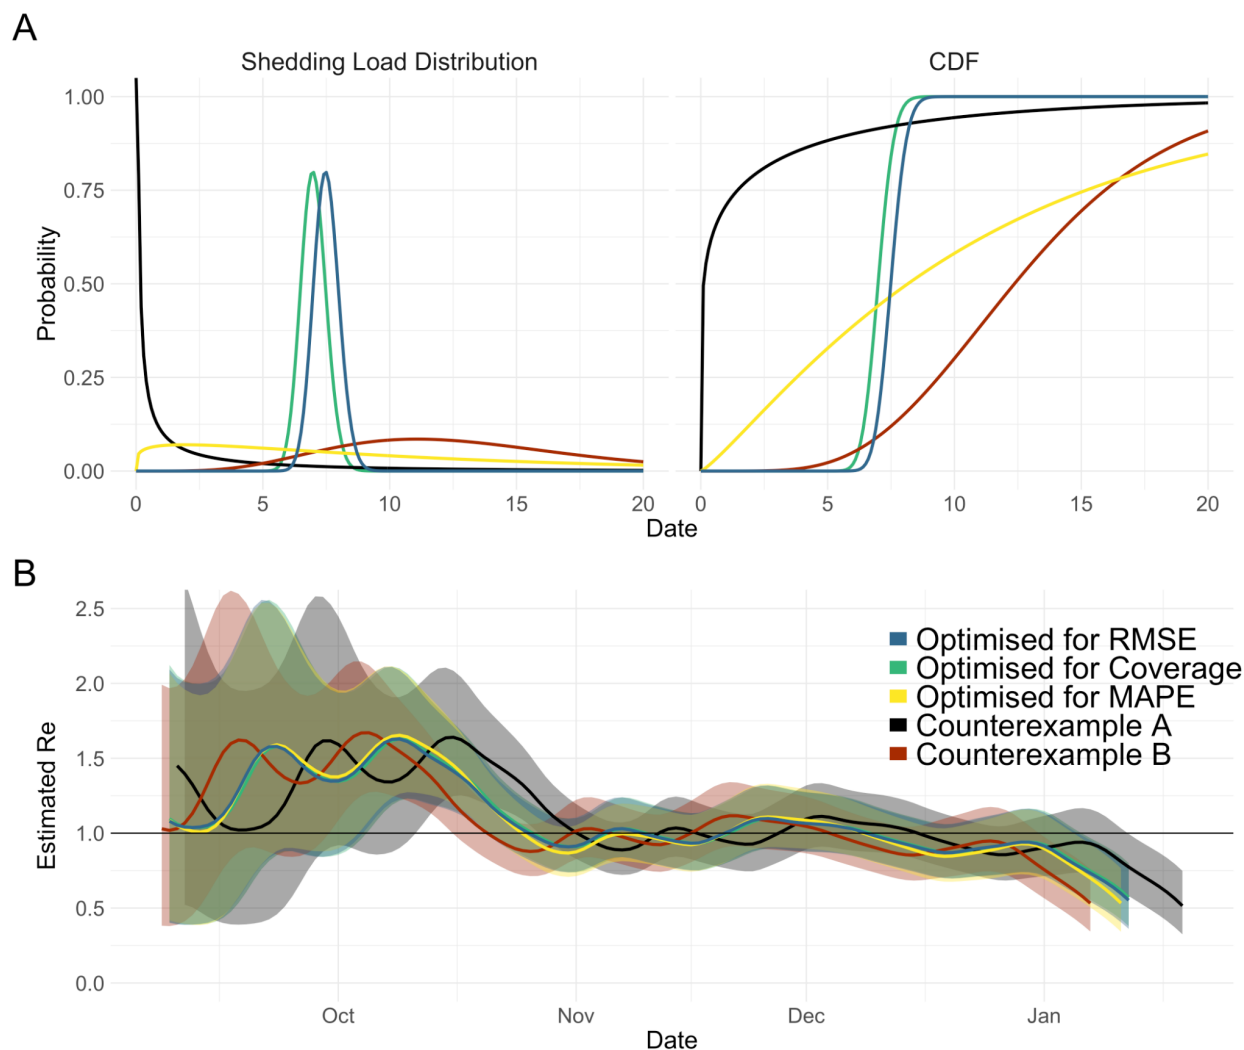

1064

1065

**Fig. S9: The optimal shedding load distributions for Zurich and two counterexamples.**

1066

Counterexample A has a mean of 2 days and standard deviation of 5 days; Counterexample B a

1067

mean of 13 days, and a standard deviation of 5 days. (A) The SLDs and their associated

1068

cumulative distribution functions. Although the SLDs differ when optimized for RMSE,

1069

Coverage, or MAPE, the median (i.e. the time after which they reach half their overall probability

1070

mass) is very comparable. (B) The resulting  $R_{ww}$  estimates for Zurich are highly similar for

1071

RMSE, Coverage, and MAPE based optimal SLDs; but differ substantially for the two

1072

counterexamples. The illustrated 95% confidence intervals of  $R_{ww}$  are based on 50 bootstrap

1073

replicates.

1074

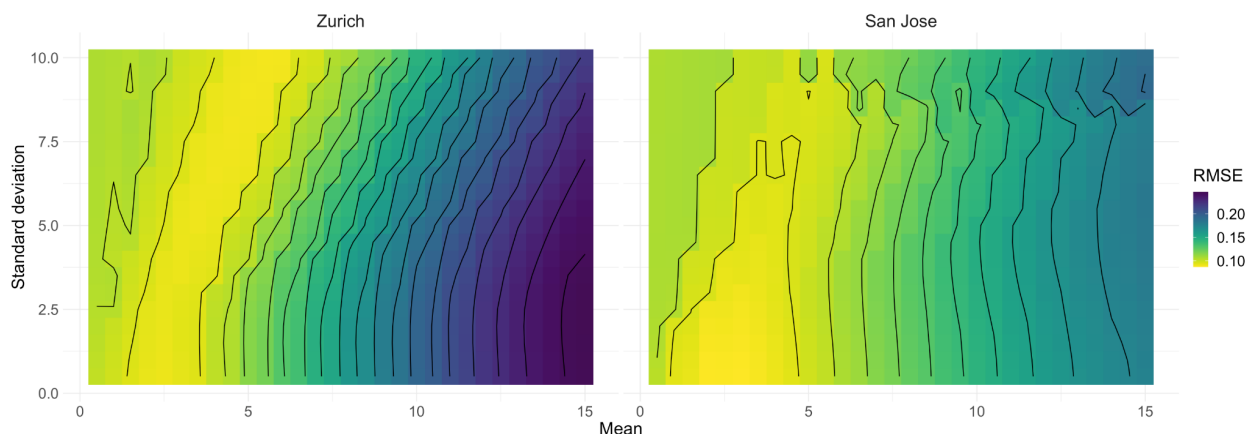

1075  
 1076 **Fig. S10: RMSE between  $R_{cc}$  and  $R_{ww}$  for different shedding load distributions from**  
 1077 **symptom onset.** We scanned across different parameter pairs (mean, standard deviation in  
 1078 days) for the SLD from time since symptom onset. For the city of Zurich, the  $R_e$  from N1 loads  
 1079 in wastewater was compared to that of confirmed cases in the catchment. For San Jose, we  
 1080 compared S gene concentrations to confirmed cases in Santa Clara County. The incubation  
 1081 period is assumed gamma distributed with mean 5.3, and standard deviation 3.2. The contour  
 1082 lines show SLD parameter pairs with equal RMSE, in steps of 10% of the optimum value.

1083  
 1084 **Table S3: Parameters of the optimal shedding distribution from symptom onset.** We  
 1085 scanned across different (mean, standard deviation) parameter pairs for the SLD from time  
 1086 since symptom onset. For the city of Zurich, the  $R_{ww}$  from N1 loads in wastewater was  
 1087 compared to that of confirmed cases in the catchment. For San Jose, we compared S gene  
 1088 concentrations to confirmed cases in Santa Clara County. For all RMSE values of the scan see  
 1089 Fig. S9. All parameters are in units of days. For the coverage, the 95% confidence intervals of  
 1090  $R_{cc}$  and  $R_{ww}$  were based on 50 bootstrap replicates in each comparison.

1091

| Comparison Method   | Optimal pair (mean; sd) | Mean within 10% of the optimum | SD within 10% of the optimum |
|---------------------|-------------------------|--------------------------------|------------------------------|
| RMSE (Zurich)       | (5.5; 10)               | [1.5, 7]                       | [0.5, 10]                    |
| Coverage (Zurich)   | (3.5; 5)                | [1.5, 8]                       | [0.5, 10]                    |
| MAPE (Zurich)       | (5.5; 10)               | [2, 6]                         | [0.5, 10]                    |
| RMSE (San Jose)     | (3; 0.5)                | [1, 5]                         | [0.5, 9]                     |
| Coverage (San Jose) | (0.5; 0.5)              | [0.5, 6]                       | [0.5, 10]                    |
| MAPE (San Jose)     | (1; 0.5)                | [0.5, 3]                       | [0.5, 10]                    |

1092  
 1093  
 1094  
 1095

1096 **Table S4: Primer and Probes**  
1097

| <u>Site</u> | <u>Target</u> | <u>Primer/Probe</u> | <u>Sequence</u>                                   |
|-------------|---------------|---------------------|---------------------------------------------------|
| Zurich      | N1            | Forward             | GACCCCAAATCAGCGAAAT                               |
|             |               | Reverse             | GACCCCAAATCAGCGAAAT                               |
|             |               | Probe               | ACCCCGCATTACGTTTGGTGGACC (5' FAM/ZEN/3' IBFQ)     |
|             | N2            | Forward             | TTACAAACATTGGCCGCAA                               |
|             |               | Reverse             | GCGCGACATTCCGAAGAA                                |
|             |               | Probe               | ACAATTTGCCCCAGCGCTTCAG (5' FAM/HEX/ZEN/ 3' IBFQ)  |
|             | PMMoV         | Forward             | GAGTGGTTTGACCTTAACGTTTGA                          |
|             |               | Reverse             | TTGTCGGTTGCAATGCAAGT                              |
|             |               | Probe               | CCTACCGAAGCAAATG (5' FAM/3' MGB)                  |
| San Jose    | N Gene        | Forward             | CATTACGTTTGGTGGACCCT                              |
|             |               | Reverse             | CCTTGCCATGTTGAGTGAGA                              |
|             |               | Probe               | CGCGATCAAACAACGTCGG (5' FAM/ZEN/3' IBFQ)          |
|             | S Gene        | Forward             | CAGACTAATTCTCCTCGGCG                              |
|             |               | Reverse             | TGCACCAAGTGACATAGTGT                              |
|             |               | Probe               | AGCTAGTCAATCCATCATTGCCT (5' HEX/ZEN/3' IBFQ)      |
|             | ORF1a         | Forward             | CAGAACTGGAACCACCTTGT                              |
|             |               | Reverse             | TACAGTTGAATTGGCAGGCA                              |
|             |               | Probe               | TGCCACAGTACGTCTACAAGC (5' FAM or HEX/ZEN/3' IBFQ) |

|       |         |                                                   |
|-------|---------|---------------------------------------------------|
| PMMoV | Forward | GAGTGGTTTGACCTTAACGTTTGA                          |
|       | Reverse | TTGTCGGTTGCAATGCAAGT                              |
|       | Probe   | CCTACCGAAGCAAATG (5' HEX/ZEN/3' IBFQ)             |
| BCoV  | Forward | CTGGAAGTTGGTGGAGTT                                |
|       | Reverse | ATTATCGGCCTAACATACATC                             |
|       | Probe   | CCTTCATATCTATACACATCAAGTTGTT (5' FAM/ZEN/3' IBFQ) |

1098  
1099  
1100



1101

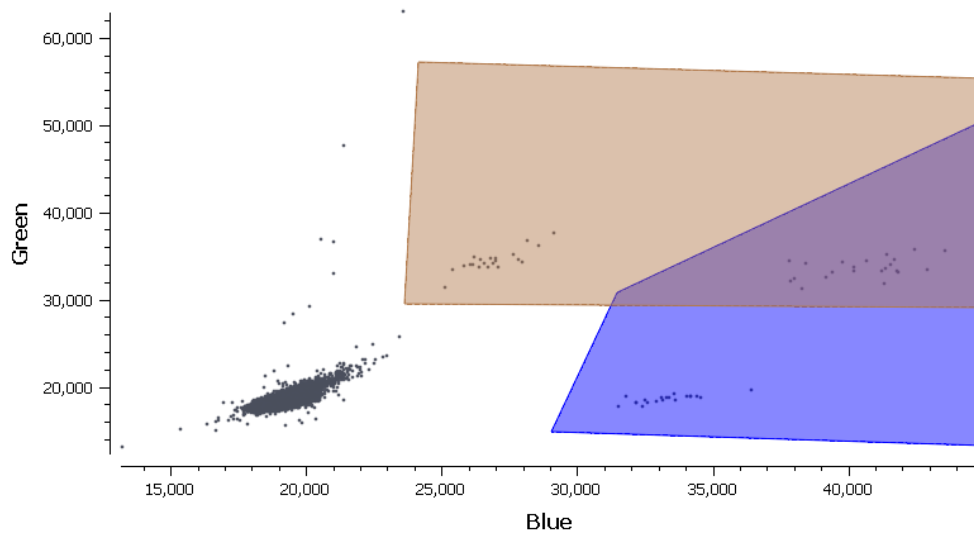

1102

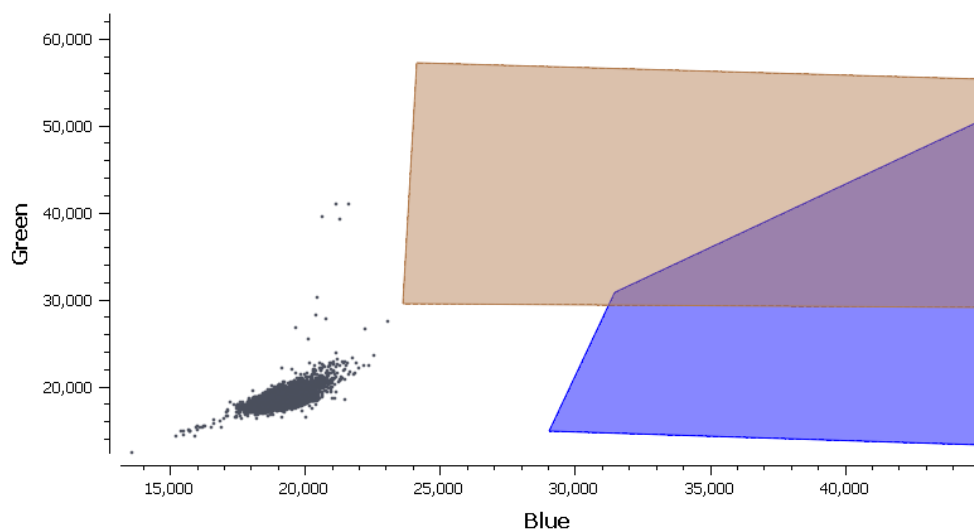

1103

1104 **Fig. S11: Fluorescence plots from the Stilla Naica Crystal Droplet PCR used for the**  
1105 **wastewater** samples from Zurich collected after 23 September 2020 from positive (top) and  
1106 negative (bottom) experimental results. Droplets positive for N1 (blue) and N2 (brown) and both  
1107 N1 and N2 (purple). RPP30 markers, detectable as elevated fluorescence in Green channel, are  
1108 included in the commercial assay used, but are not further analyzed.

1109

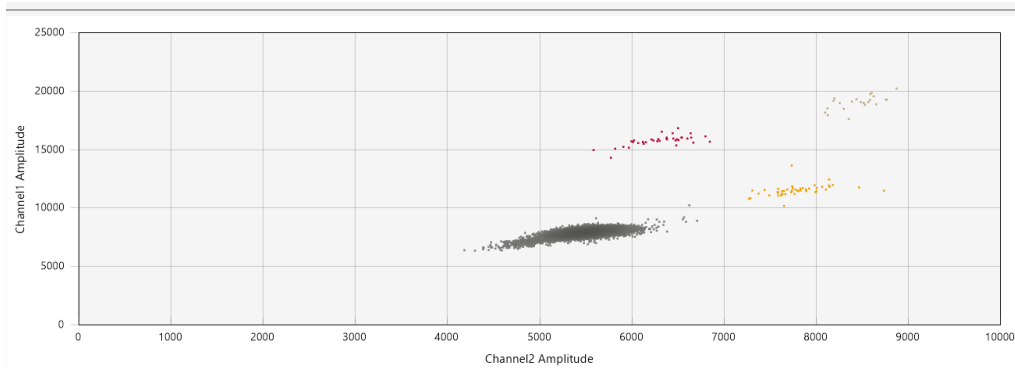

1110

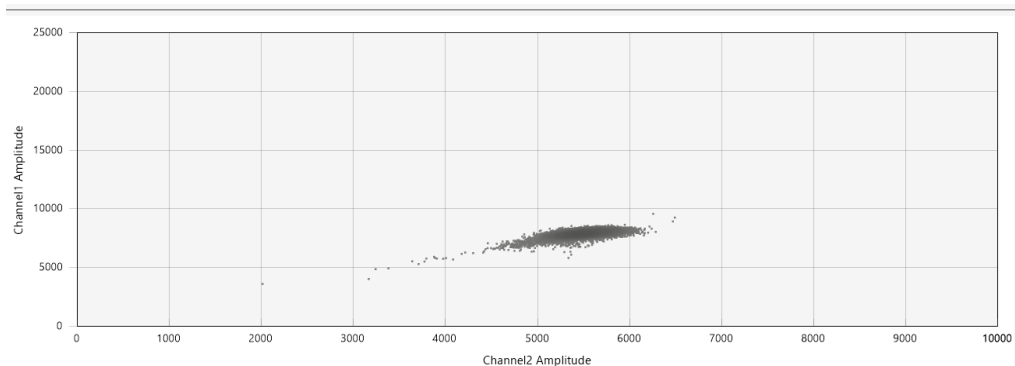

1111

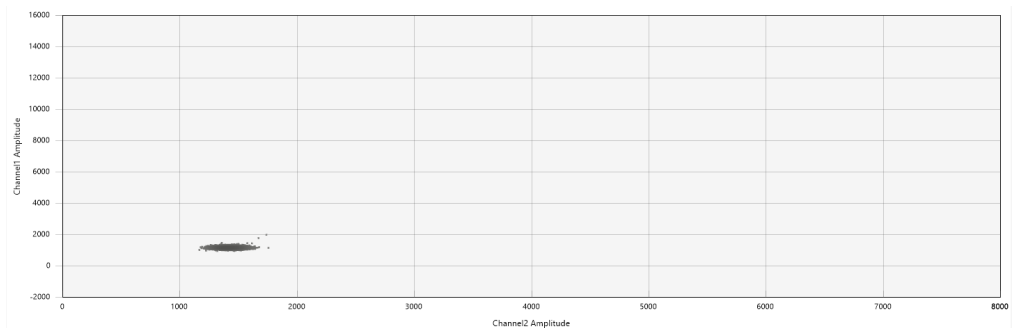

1112

1113 **Fig. S12: Fluorescence plots from the Bio-Rad QX200 used for the wastewater samples.**

1114 Samples from Zurich collected from 03-20 September 2020 are shown in positive (top) and

1115 negative (middle) experimental results. Droplets positive for N1 (red) and N2 (yellow) and both

1116 N1 and N2 (brown) markers. Negative (bottom) experimental results are also shown for San

1117 Jose Corresponding positive experimental results are provided in the reference of the

1118 associated protocol <sup>30</sup>.

1119

1120

1121

1122

| ITEM TO CHECK                                                                      | PROVIDED                       | COMMENT                                                                                                               |
|------------------------------------------------------------------------------------|--------------------------------|-----------------------------------------------------------------------------------------------------------------------|
|                                                                                    | Y/N                            |                                                                                                                       |
| <b>1. SPECIMEN</b>                                                                 |                                |                                                                                                                       |
| Detailed description of specimen type and numbers                                  | Y                              | Methods of Main Text                                                                                                  |
| Sampling procedure (including time to storage)                                     | Y                              | Methods of Main Text                                                                                                  |
| Sample aliquotation, storage conditions and duration                               | Y                              | Methods of Main Text                                                                                                  |
| <b>2. NUCLEIC ACID EXTRACTION</b>                                                  |                                |                                                                                                                       |
| Description of extraction method including amount of sample                        | Y                              | Methods of Main Text                                                                                                  |
| Volume of solvent used to elute/resuspend extract                                  | Y                              | Methods of Main Text                                                                                                  |
| Number of extraction replicates                                                    | Y                              | Methods of Main Text                                                                                                  |
| Extraction blanks included?                                                        | Y                              | Methods of Main Text                                                                                                  |
| <b>3. NUCLEIC ACID ASSESSMENT AND STORAGE</b>                                      |                                |                                                                                                                       |
| Method to evaluate quality of nucleic acids                                        | N                              | Not Done                                                                                                              |
| Method to evaluate quantity of nucleic acids (including molecular                  | N                              | Not Done                                                                                                              |
| Storage conditions: temperature, concentration, duration, buffer, aliquots         | Y                              | Methods of Main Text                                                                                                  |
| Clear description of dilution steps used to prepare working DNA solution           | Y                              | Methods of Main Text                                                                                                  |
| <b>4. NUCLEIC ACID MODIFICATION</b>                                                |                                |                                                                                                                       |
| Template modification (digestion, sonication, pre-amplification,                   | N                              | NA                                                                                                                    |
| Details of repurification following modification if performed                      | Y                              | No Repurification for Zurich Samples, Zymo Column for San Jose Samples Described in Methods of Main Text              |
| <b>5. REVERSE TRANSCRIPTION</b>                                                    |                                |                                                                                                                       |
| cDNA priming method and concentration                                              | N                              | NA                                                                                                                    |
| One or two step protocol (include reaction details for two step)                   | Y                              | Methods of Main Text                                                                                                  |
| Amount of RNA added per reaction                                                   | Y                              | Methods of Main Text                                                                                                  |
| Detailed reaction components and conditions                                        | Y                              | Supplemental Information                                                                                              |
| Estimated copies measured with and without addition of RT*                         | N                              | Not Done                                                                                                              |
| Manufacturer of reagents used with catalogue and lot numbers                       | N                              | Reagents, Manufacturers, and Catalogue Numbers Reported in Supplemental Material. Lot Numbers are Not Reported        |
| Storage of cDNA: temperature, concentration, duration, buffer and                  | Y                              | NA                                                                                                                    |
| <b>6. dPCR OLIGONUCLEOTIDES DESIGN AND TARGET INFORMATION</b>                      |                                |                                                                                                                       |
| Sequence accession number or official gene symbol                                  | Y                              | Published Reference (Zurich) or Supplemental (San Jose)                                                               |
| Method (software) used for design and <i>in silico</i> verification                | Y                              | Published Reference (Zurich) or Supplemental (San Jose)                                                               |
| Location of amplicon                                                               | Y                              | Published Reference (Zurich) or Supplemental (San Jose)                                                               |
| Amplicon length                                                                    | Y                              | Published Reference (Zurich) or Supplemental (San Jose)                                                               |
| Primer and probe sequences (or amplicon context sequence)**                        | Y                              | Supplemental Information                                                                                              |
| Location and identity of any modifications                                         | Y                              | NA                                                                                                                    |
| Manufacturer of oligonucleotides                                                   | Y                              | Supplemental Information                                                                                              |
| <b>7. dPCR PROTOCOL</b>                                                            |                                |                                                                                                                       |
| Manufacturer of dPCR instrument and instrument model                               | Y                              | Supplemental Information                                                                                              |
| Buffer/kit manufacturer with catalogue and lot number                              | Y                              | Supplemental Information                                                                                              |
| Primer and probe concentration                                                     | Y                              | Supplemental Information                                                                                              |
| Pre-reaction volume and composition (incl. amount of template                      | Y                              | Supplemental Information                                                                                              |
| Template treatment (initial heating or chemical denaturation)                      | N                              | NA                                                                                                                    |
| Polymerase identity and concentration, Mg <sup>2+</sup> and dNTP concentrations*** | N                              | Included in Kit Manuals                                                                                               |
| Complete thermocycling parameters                                                  | Y                              | Supplemental Information                                                                                              |
| <b>8. ASSAY VALIDATION</b>                                                         |                                |                                                                                                                       |
| Details of optimisation performed                                                  | N                              | Commercial Kit, Followed Manufacturer's Instructions                                                                  |
| Analytical specificity (vs. related sequences) and limit of blank (LOB)            | N                              | Not done (Zurich) or Supplemental (San Jose)                                                                          |
| Analytical sensitivity/LoD and how this was evaluated                              | Y                              | Methods of Main Text                                                                                                  |
| Testing for inhibitors (from biological matrix/extraction)                         | Y                              | Methods of Main Text                                                                                                  |
| <b>9. DATA ANALYSIS</b>                                                            |                                |                                                                                                                       |
| Description of dPCR experimental design                                            | Y                              | Methods of Main Text                                                                                                  |
| Comprehensive details negative and positive of controls (whether a                 | Y                              | Methods of Main Text                                                                                                  |
| Partition classification method (thresholding)                                     | Y                              | Supplemental Information                                                                                              |
| Examples of positive and negative experimental results (including                  | Y                              | Supplemental Information                                                                                              |
| Description of technical replication                                               | Y                              | Methods of Main Text                                                                                                  |
| Repeatability (intra-experiment variation)                                         | Y                              | Supplemental Information                                                                                              |
| Reproducibility (inter-experiment/user/lab etc. variation )                        | N                              | Assays were only completed within one laboratory                                                                      |
| Number of partitions measured (average and standard deviation )                    | Y                              | Supplemental Information                                                                                              |
| Partition volume                                                                   | Y                              | Reported by Manufacturer                                                                                              |
| Copies per partition (λ or equivalent ) (average and standard deviation)           | Y                              | Supplemental Information                                                                                              |
| dPCR analysis program (source, version)                                            | Y                              | Methods of Main Text                                                                                                  |
| Description of normalisation method                                                | N                              | NA                                                                                                                    |
| Statistical methods used for analysis                                              | Y                              | Methods of Main Text                                                                                                  |
| Data transparency                                                                  | raw data available on request: | Data Availability Statement Includes Resources for Zurich Measurements, Contact Information for San Jose Measurements |

1123

1124 **Table S5: dMIQE Checklist<sup>63</sup> for RT-dPCR assays targeting SARS-CoV-2 gene markers**  
 1125 **N1 and N2 (Zurich Site) and S, N, and Orf1a (San Jose Site).** Checklist is not included for  
 1126 other RT-qPCR (PMMoV, Zurich Site) or RT-dPCR (BCoV, PMMoV, San Jose) Assays.

## 1127 **Supplemental Results:**

### 1128 **Quality Control:**

1129 *Zurich, Switzerland.* One sample (11 October) was removed from analysis because the dilute  
1130 sample (1:10) was below LOQ and the undiluted sample was inhibited, as defined by recovery  
1131 of less than 80% of the synthetic SARS-CoV-2 RNA added in.

1132 PMMoV concentrations were obtained for all dates except October 4. Mean (standard deviation)  
1133 PMMoV loads were 16.5 (0.12)  $\log_{10}$  (gc/day). All PMMoV loads fell within 3 standard deviations  
1134 of the mean, consistent with a normal distribution, except on 29 October (16.1  $\log_{10}$  gc/day). The  
1135 sample was subsequently removed from further analysis.

1136 *San Jose, California, USA.* From San Jose Wastewater Treatment Plant (San Jose, California,  
1137 USA), daily samples were collected and processed throughout. PMMoV concentrations were  
1138 mean (standard deviation) 8.9 (0.20)  $\log_{10}$  (gc/g-dry weight). On two days (03 January 2021, 18  
1139 February 2021), PMMoV concentrations exceeded the mean plus three times the standard  
1140 deviation. On one day (19 March 2021), PMMoV concentrations fell below the mean minus  
1141 three times the standard deviation. These three samples were excluded from further analysis.  
1142 All samples met criteria for inclusion based on BCoV concentrations, which were all greater than  
1143 10% of the expected concentrations based on the amount added.

## 1144 **Supplemental Methods:**

### 1145 **Managing PCR inhibition in San Jose sludge samples:**

1146 We diluted the solids in DNA/RNA Shield (Zymo Research, Irvine, CA, USA) (hereafter referred  
1147 to as “diluent”) prior to RNA extraction, inhibitor removal, and RT-dPCR, as described in the  
1148 main text. This dilution was necessary as direct RNA extraction from the solids contained  
1149 inhibitors so dilution of the RNA template prior to RT-dPCR was required<sup>15</sup>. To determine an  
1150 optimal concentration of solids to add to the diluent (mg wet weight / mL diluent) to reduce  
1151 inhibition, but retain reasonable sensitivity, we quantified SARS-CoV-2 RNA in solutions with  
1152 solids concentrations from 7.5 mg/mL to 150 mg/mL, where we used the exact methods  
1153 described in the main text. We aimed to identify the highest concentrations of solids in solution  
1154 that did not show inhibition. Representative results from two different samples from San Jose  
1155 are shown in Figure S13 where concentrations of SARS-CoV-2 RNA per g dry weight of solids  
1156 is shown for different starting concentrations of solids in diluent. Note that the numbers on the y-  
1157 axis are directly comparable between solutions, as we account for the different mass of solids in  
1158 the dimensional analysis to derive the SARS-CoV-2 RNA concentration. The relatively lower  
1159 concentrations for SARS-CoV-2 RNA for solutions of 150 mg/mL suggest the presence of  
1160 inhibition at this relatively high solids concentration. Concentrations are relatively similar among  
1161 the lower concentration solutions suggesting that starting at 75 mg/mL, inhibition is mostly  
1162 alleviated. Only one gene target from one of the samples (the N gene in sample A shown in the  
1163 top graph) showed slightly higher concentrations in more dilute solutions. Given these results  
1164 we therefore moved forward using 75 mg/mL for the method.

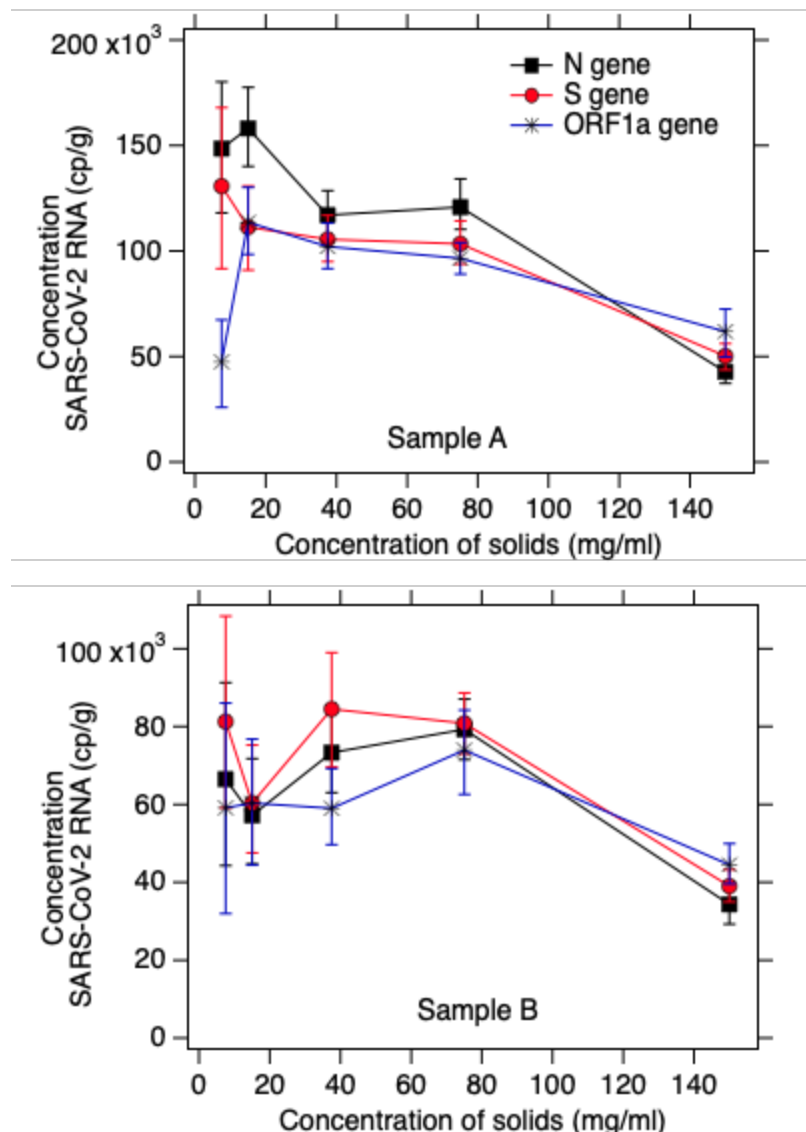

1165

1166 **Figure S13.** Representative results from inhibition titration experiments with two samples from  
1167 San Jose. The x-axis shows the concentration of solids (wet weight) added to the DNA/RNA  
1168 Shield diluent in units of mg/mL. The y-axis shows the concentration of the three SARS-CoV-2  
1169 RNA targets in the solids in units of gc/g dry weight. Error bars represent standard deviations as  
1170 total error from the dPCR instrument's software.

1171
